# Supplementary material
Source: Research Square preprint supplement (doi:10.21203/rs.3.rs-9091325/v1)
Supplement: Supplementary file 1 [file 8ba00e653baa17ffd145b708.pdf]

# **Sex-specific Genetic Regulatory Effects in Chickens**

The supplementary information contains:

**Supplementary Figures**

**Supplementary Tables**

**Supplementary Data**

## List of Supplementary Figures:

- Supplementary Fig. 1. Genotypic characteristics of the ChickenSexGTEx cohort
- Supplementary Fig. 2. Tissue sample collection and transcriptomic profiling of the ChickenSexGTEx cohort
- Supplementary Fig. 3. Partitioning of variance in gene expression and alternative splicing, and functional enrichment
- Supplementary Fig. 4. *cis-h<sup>2</sup>* of gene expression and alternative splicing, and impacts on e/sGene detection
- Supplementary Fig. 5. *cis*-molQTL mapping modeling
- Supplementary Fig. 6. Fine-mapping of *cis*-molQTL and functional annotation
- Supplementary Fig. 7. Characterization of allelic heterozygosity in eGenes and sGenes
- Supplementary Fig. 8. Comparative analysis of eGene/sGene detection power across studies
- Supplementary Fig. 9. Colocalization of eQTL and sQTL, and characterization of pleiotropic regulatory variants
- Supplementary Fig. 10. Validation of eQTL across ChickenGTEx pilot phase
- Supplementary Fig. 11. Characterization of tissue-sharing patterns and regulatory features of sQTL
- Supplementary Fig. 12. Tissue-specific regulatory effect of variant *rs3388316055* on *LPAR2* expression in whole blood
- Supplementary Fig. 13. Sample information and preliminary analysis of sc/snRNAseq data
- Supplementary Fig. 14. Transcriptomic similarity heatmap of cell types annotated in the single-cell atlas
- Supplementary Fig. 15 to 22. Single-cell atlas characterization for 31 tissues
- Supplementary Fig. 23 to 26. Cell type proportion deconvolution across the 280-individual ChickenSexGTEx cohort
- Supplementary Fig. 27 to 29. Validation of cell fraction deconvolution accuracy
- Supplementary Fig. 30. Correlation between median cell fraction and deconvolution accuracy
- Supplementary Fig. 31. Enrichment analysis of tissue-specific genes and cell type marker genes
- Supplementary Fig. 32. Characterization of factors influencing cell type proportions
- Supplementary Fig. 33. Colocalization of cell fraction cf-QTL with bulk tissue eQTL
- Supplementary Fig. 34. Cell-fraction interacted eQTL (cieQTL) mapping and characterization
- Supplementary Fig. 35. Comparative tissue-specificity of variant-mediated gene regulation in erythrocytes versus bulk tissues

Supplementary Fig. 36. Functional annotation and tissue-sharing of sex-biased genes

Supplementary Fig. 37. Characterization of sex-biased co-expression modules and cell types

Supplementary Fig. 38. Correlations of cis-h<sup>2</sup> estimates for gene expression in male- and female-stratified populations

Supplementary Fig. 39. Sex-stratified population structure and sex-biased gene regulation

Supplementary Fig. 40. Example of the concordant effects of the male-biased eQTL *rs15332495* in regulating *ZBTB11* across 23 tissues

Supplementary Fig. 41. Mechanistic mediation analysis of sex-biased gene regulation

Supplementary Fig. 42. Estimation of cis-h<sup>2</sup> with SV inclusion and SV-mediated genetic regulation across tissues

Supplementary Fig. 43. Tissue-sharing patterns and sex-biased regulation of SV-eQTL

Supplementary Fig. 44. Genetic enrichment of molQTL and context-dependent QTL with complex traits, and examples of the specialized colocalization with molQTL

Supplementary Fig. 45. Examples and summary of complex trait GWAS loci colocalized with molQTL, content-dependent eQTL or tissue-specific eQTL.

## **List of Supplementary Tables:**

Supplementary Table 1. Summary of tissue type information and anatomical sites of samples collected from ChickenSexGTEx cohort.

Supplementary Table 2. Comparison of identified eGenes and sGenes numbers between ChickenSexGTEx and ChickenGTEx pilot phase

Supplementary Table 3. Summary information of 26 complex traits and number of significant GWAS loci

## **List of Supplementary Data (in a separate file):**

Data S1. Information of 8,265 bulk RNA-seq samples across 32 tissues from 280 ChickenSexGTEx cohort

Data S2. Metadata of 280 ChickenSexGTEx individuals

Data S3. Variance of gene expression explained by recorded metadata

Data S4. Marker gene lists used to annotate 127 different cell types across 31 tissues

Data S5. Cell fractions deconvoluted from 7,969 bulk RNA-seq samples.

Data S6. Summary of genes with sex-biased expression across 30 tissues

Data S7. Summary of sex-biased gene expression networks across 30 tissues

Data S8. Summary of sex-biased cell types across 30 tissues

Data S9. Summary of sex-biased eQTL across 30 chicken tissues

Data S10. Mediation analysis of sex-biased eQTL by TF expression, cell fraction, and gene expression network module.

Data S11. Fine mapping results of leading SV across 32 tissues

Data S12. Summary of significant loci identified from serum lipid metabolite GWAS

Data S13. Summary of sex-different serum lipid GWAS loci explained by sex-biased regulatory variants

Data S14. LDSC enrichment of chicken sQTL on genetic architectures of human complex traits

Data S15. Summary statistics of GWAS results from human complex traits

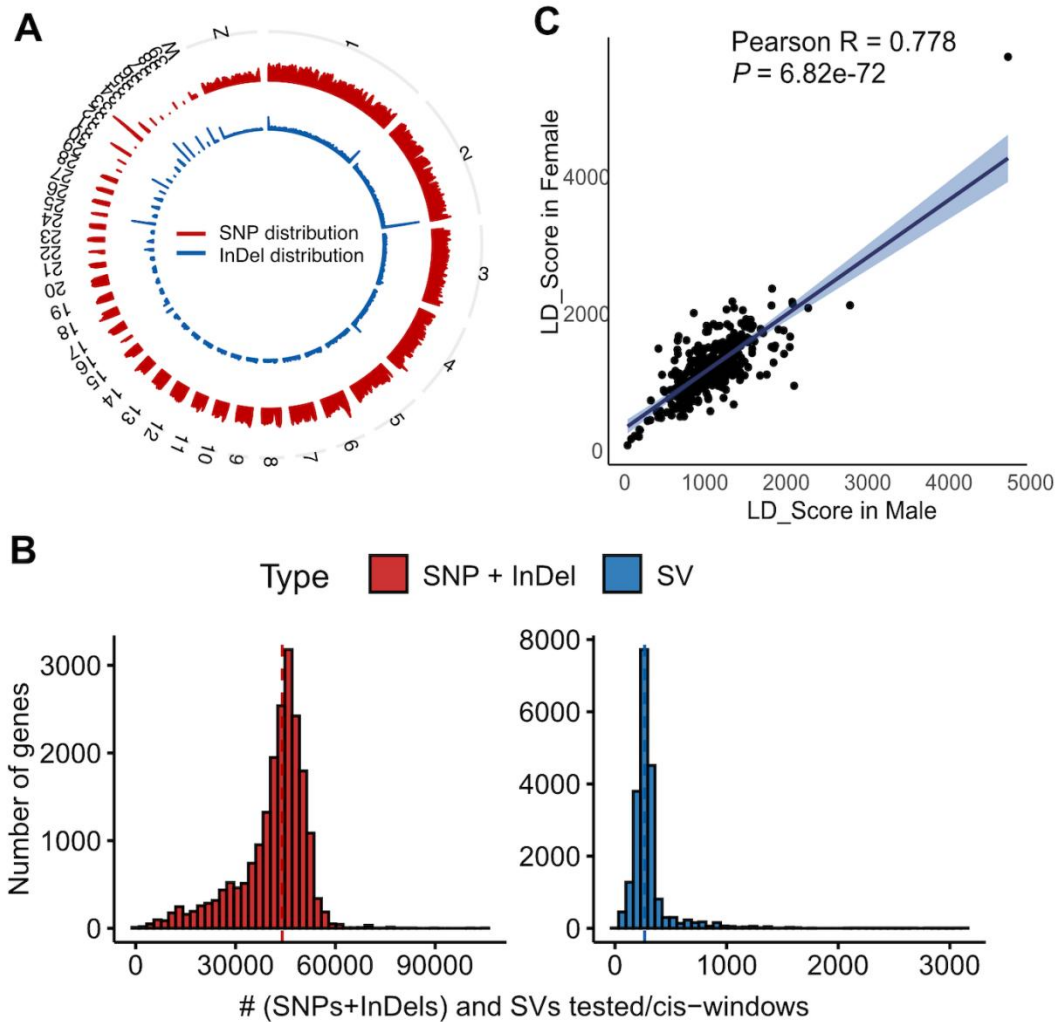

**Supplementary Fig. 1. Genotypic characteristics of the ChickenSexGTEx cohort**

(A) Genome-wide density distribution of single-nucleotide polymorphism (SNP) and insertion/deletion (InDel) across the chicken genome. Densities were calculated as the number of variants per 1MB. (B) Count of genetic variants within  $\pm 1$  Mb flanking the transcription start site (TSS) of target genes. Left y-axis (red): counts of SNP and InDel. Right y-axis (blue): counts of SVs. (C) Linkage disequilibrium (LD) score distribution of SNPs genotyped in male- and female-stratified subpopulations. LD is measured as Pearson  $r^2$ . Solid lines represent the smoothed average LD decay, with shaded areas indicating the 95% confidence interval.

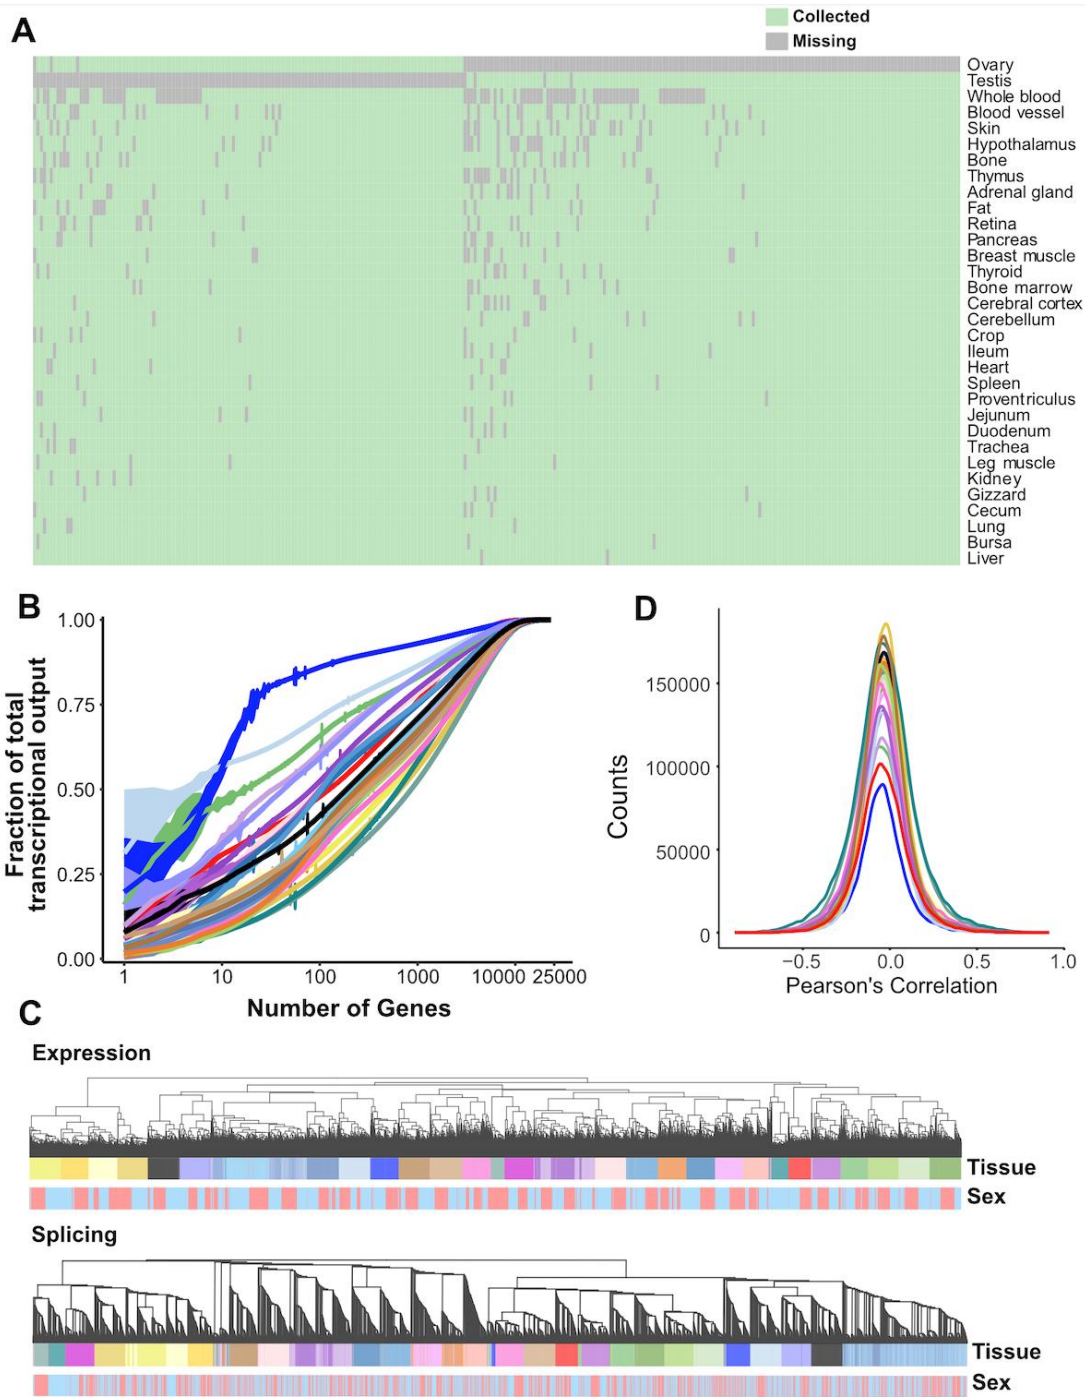

**Supplementary Fig. 2. Tissue sample collection and transcriptomic profiling of the ChickenSexGTEch cohort**

(A) Matrix of successfully collected tissue samples from 280 individuals. Columns represent individual chickens, and rows represent tissue types. Green blocks indicate collected samples; gray indicates missing samples. (B) Cumulative fraction of normalized total expression (sum of TPM) is plotted against the number of detected genes per tissue ( $TPM \geq 1$ ). Tissue types are color-coded, consistent with the color key provided in Fig. 2E. (C) Hierarchical clustering of samples based on gene expression (top panel) and alternative splicing patterns (bottom panel).

Clustering is generated using the top 5,000 most variably expressed genes or splicing events (measured by coefficient of variation). Tissue and sex categories follow the color key in Fig. 2E. **(D)** Pairwise Pearson's correlation matrices across tissues for gene expression and alternative splicing profiles. Tissue types are color-coded as specified in Fig. 2E.

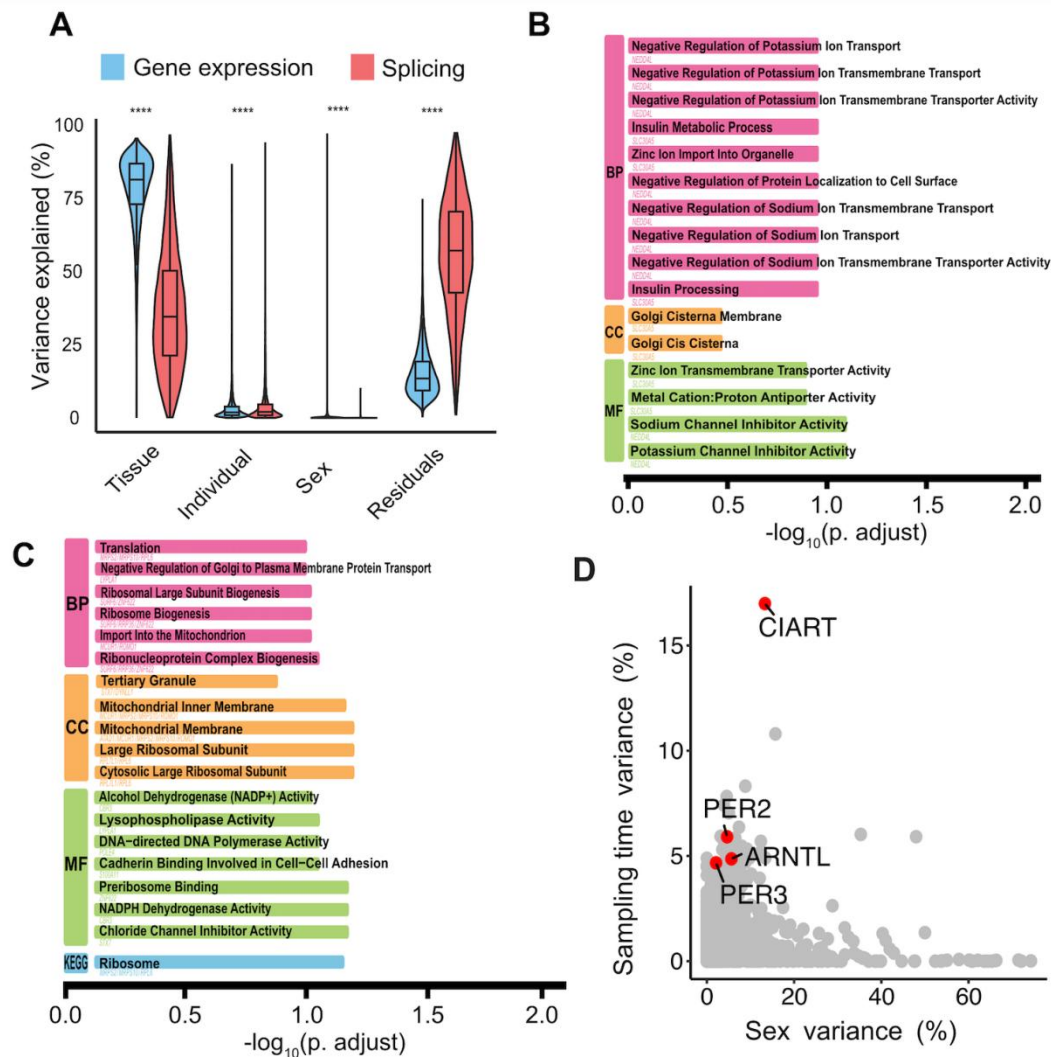

### Supplementary Fig. 3. Partitioning of variance in gene expression and alternative splicing, and functional enrichment

**(A)** Proportion of variance in gene expression and alternative splicing explained by tissue, individual, and sex. **(B)** Gene Ontology (GO) and Kyoto Encyclopedia of Genes and Genomes (KEGG) enrichment results for genes whose expression variance is predominantly driven by sex. **(C)** GO and KEGG enrichment results of genes whose alternative splicing variance is mainly driven by individual-specific effects. **(D)** Partitioning of variance in gene expression attributed to sampling time and sex, quantified by analysis of variance (ANOVA). Each point represents one gene, plotted by variance explained by sex (x-axis) versus sampling time (y-axis). Genes associated with circadian rhythm are highlighted in red.

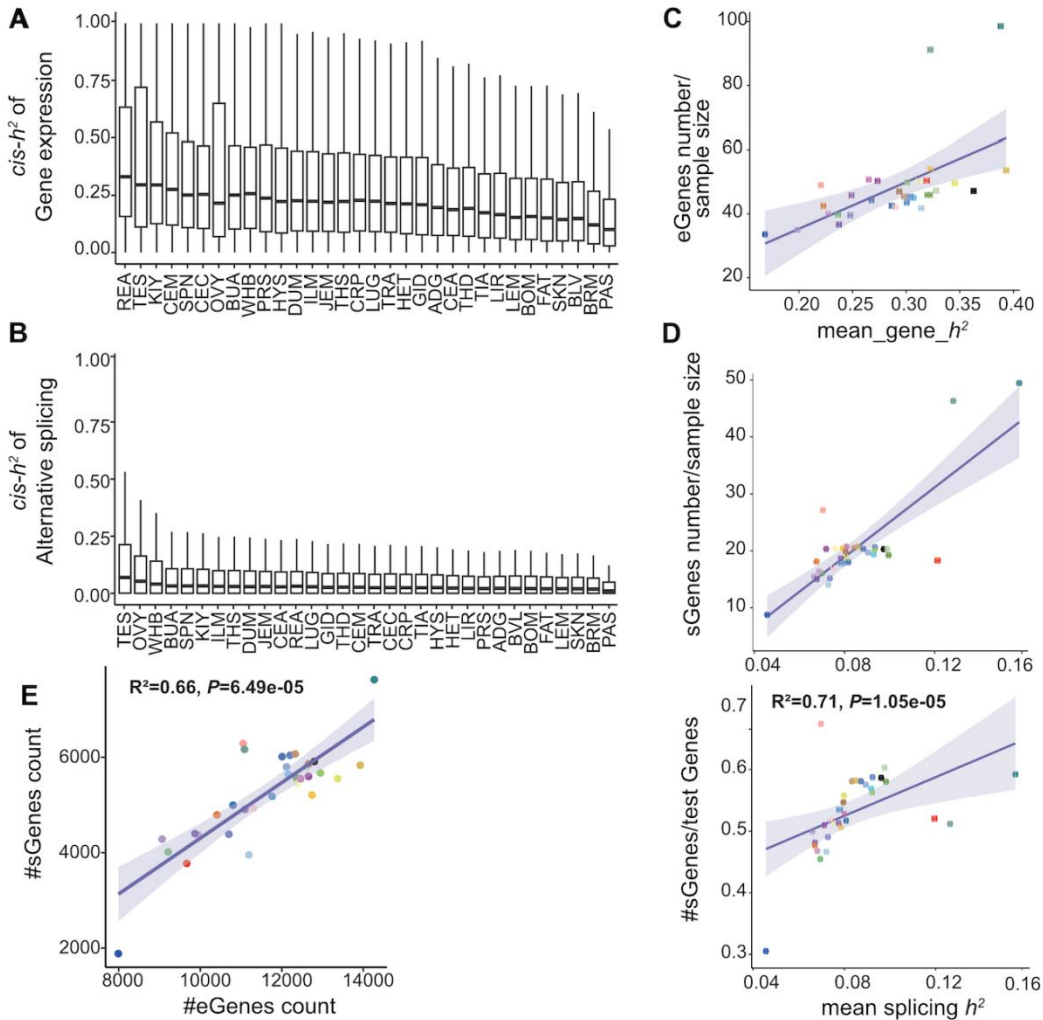

**Supplementary Fig. 4.  $cis-h^2$  of gene expression and alternative splicing, and impacts on e/sGene detection**

(A)  $cis-h^2$  estimates of gene expression across 32 tissues. (B)  $cis-h^2$  estimates of alternative splicing across 32 tissues. (C) Correlation between the average  $cis-h^2$  of gene expression and the number of eGenes per sample size. (D) Correlation between the average  $cis-h^2$  of gene alternative splicing and the number of sGenes per sample size (top) and per tested gene set (bottom), respectively. (E) Correlation between the number of eGenes and sGenes across 32 tissues.

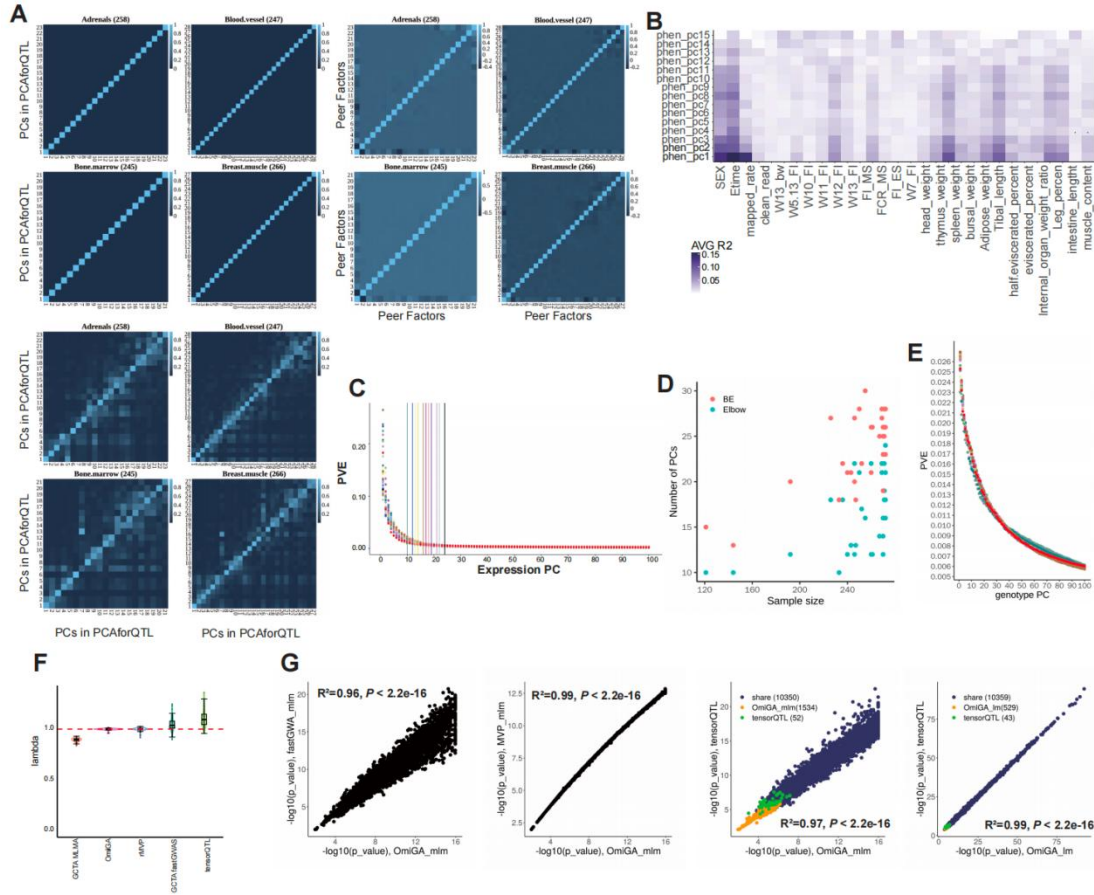

### Supplementary Fig. 5. *cis*-molQTL mapping modeling

(A) Correlation of predicted covariates for gene expression, derived from PCAforQTL and PEER factor analysis in representative tissues. (B) Average correlation between the top 15 predicted covariates per tissue and recorded experimental metadata. (C) Proportion of variance explained (PVE) by ordered principle components (PCs) of gene expression. Lines denote elbow points for optimal PC selection. Tissue types are color-coded as specified in Fig. 2E. (D) Number of expression PCs selected via two different methods across 32 tissues. (E) PVE by ordered PCs of genotype data. Tissue types are color-coded as specified in Fig. 2E. (F) Comparison of genomic inflation control efficiency across linear model approaches: GCTA\_MLMA, OmiGA, rMVP\_mlm, and GCTA\_fastGWA (linear mixed models) versus tensorQTL (general linear model). (G) Comparison of the statistical power of linear model and linear mixed model to detect *cis*-eQTL in liver tissue.

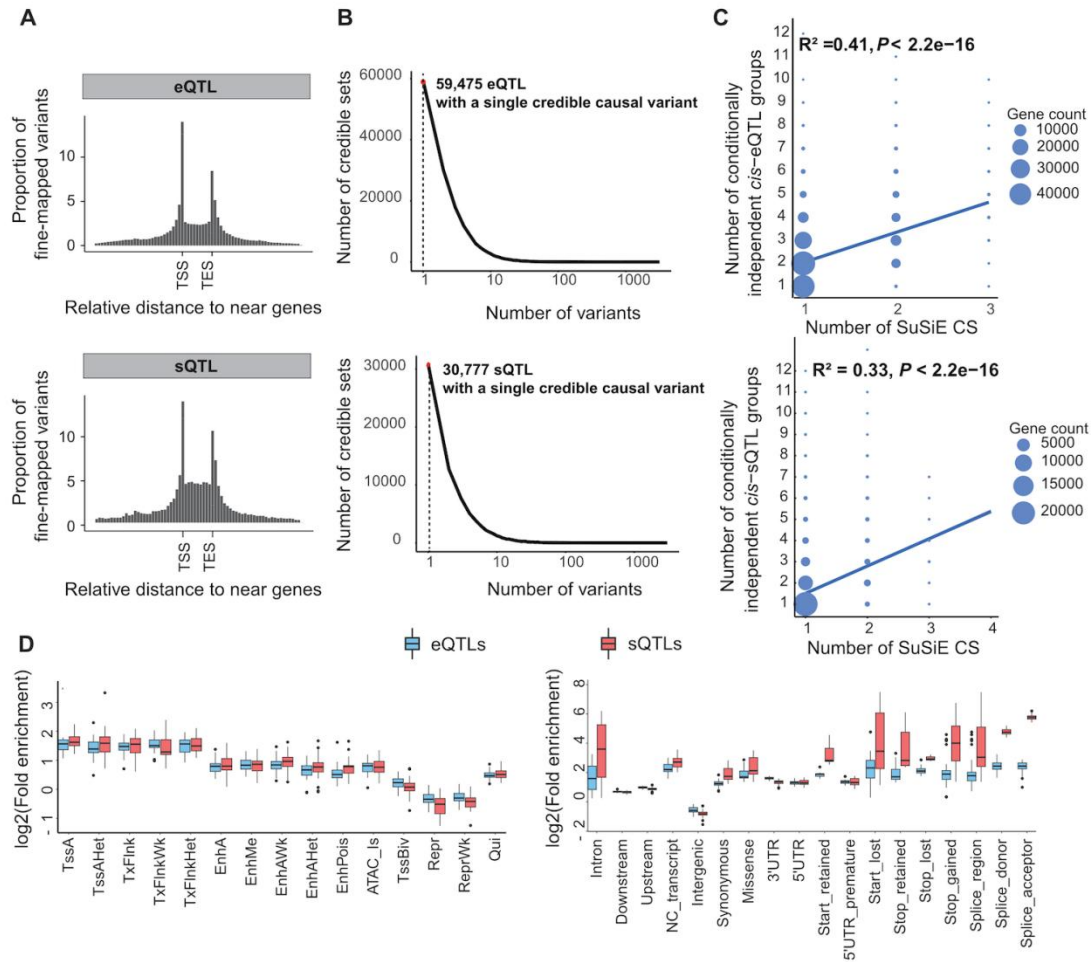

**Supplementary Fig. 6. Fine-mapping of *cis*-molQTL and functional annotation**

(A) Proportion of fine-mapped eQTL and sQTL plotted against their distance to the TSS and TES of target genes. (B) Number of variants in 95% fine-mapped credible sets of eQTL (top) and sQTL (bottom), respectively. (C) Correlation between the number of fine-mapped credible sets and the number of conditionally independent molQTL. The top panel shows results for eQTL; the bottom one shows results for sQTL. (D) Enrichment analysis of eQTL and sQTL in annotated functional elements (left panel) and genomic regions (right panel) across the chicken genome.

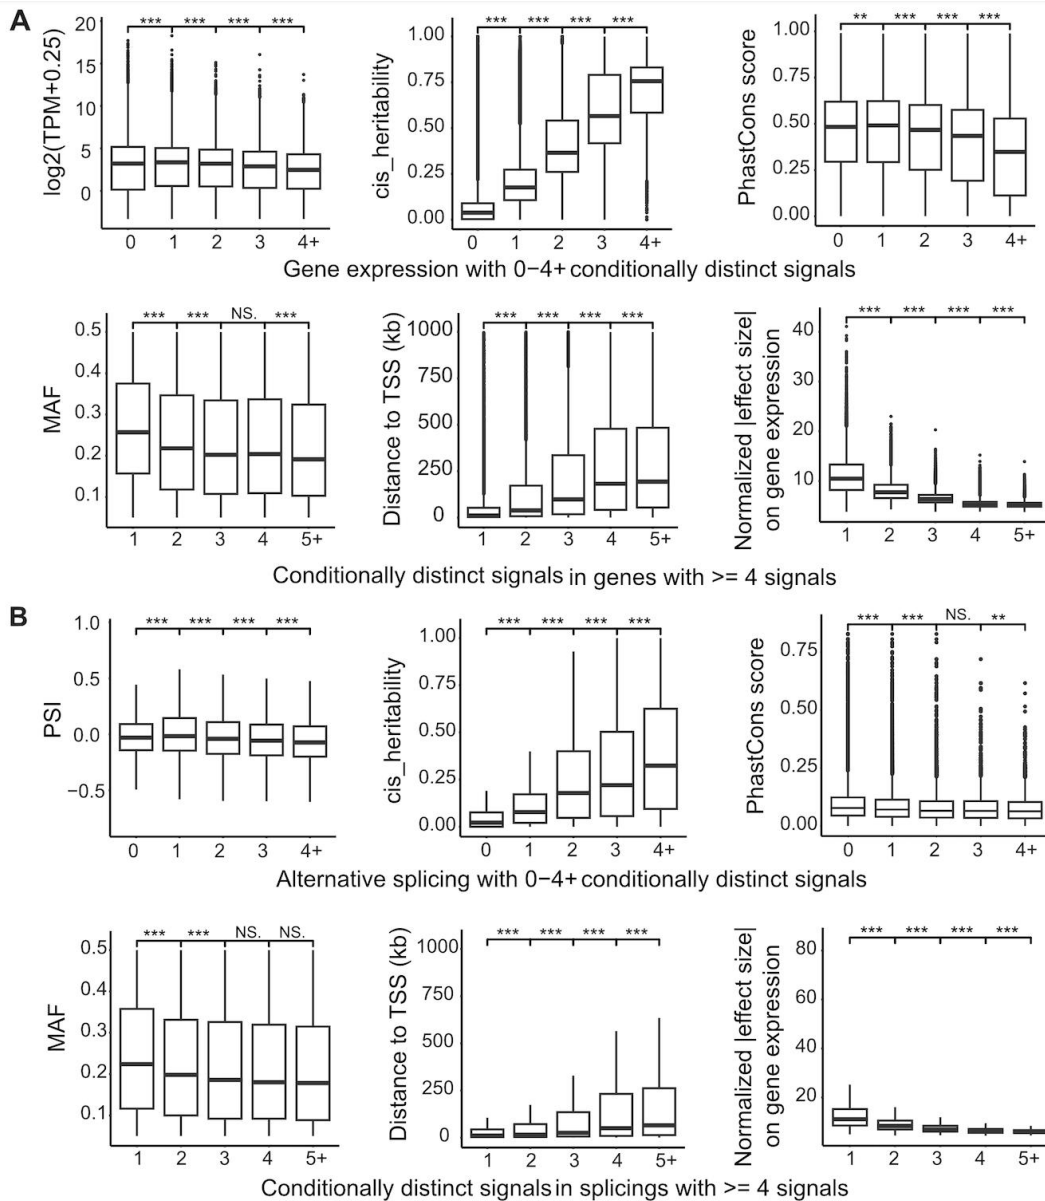

**Supplementary Fig. 7. Characterization of allelic heterozygosity in eGenes and sGenes**  
**(A)** Boxplots showing gene expression levels,  $cis-h^2$ , and genome conservation scores for genes regulated by 0–4 independent eQTL (top three panels); and minor allele frequency (MAF), distance to TSS, and effect size for eQTL stratified by significance rank (bottom three panels).  
**(B)** Boxplots showing alternative splicing event abundance,  $cis-h^2$ , and genome conservation scores for genes regulated by 0–4 independent sQTL (top three panels); and MAF, distance to TSS, and effect size for sQTL stratified by significance rank (bottom three panels).

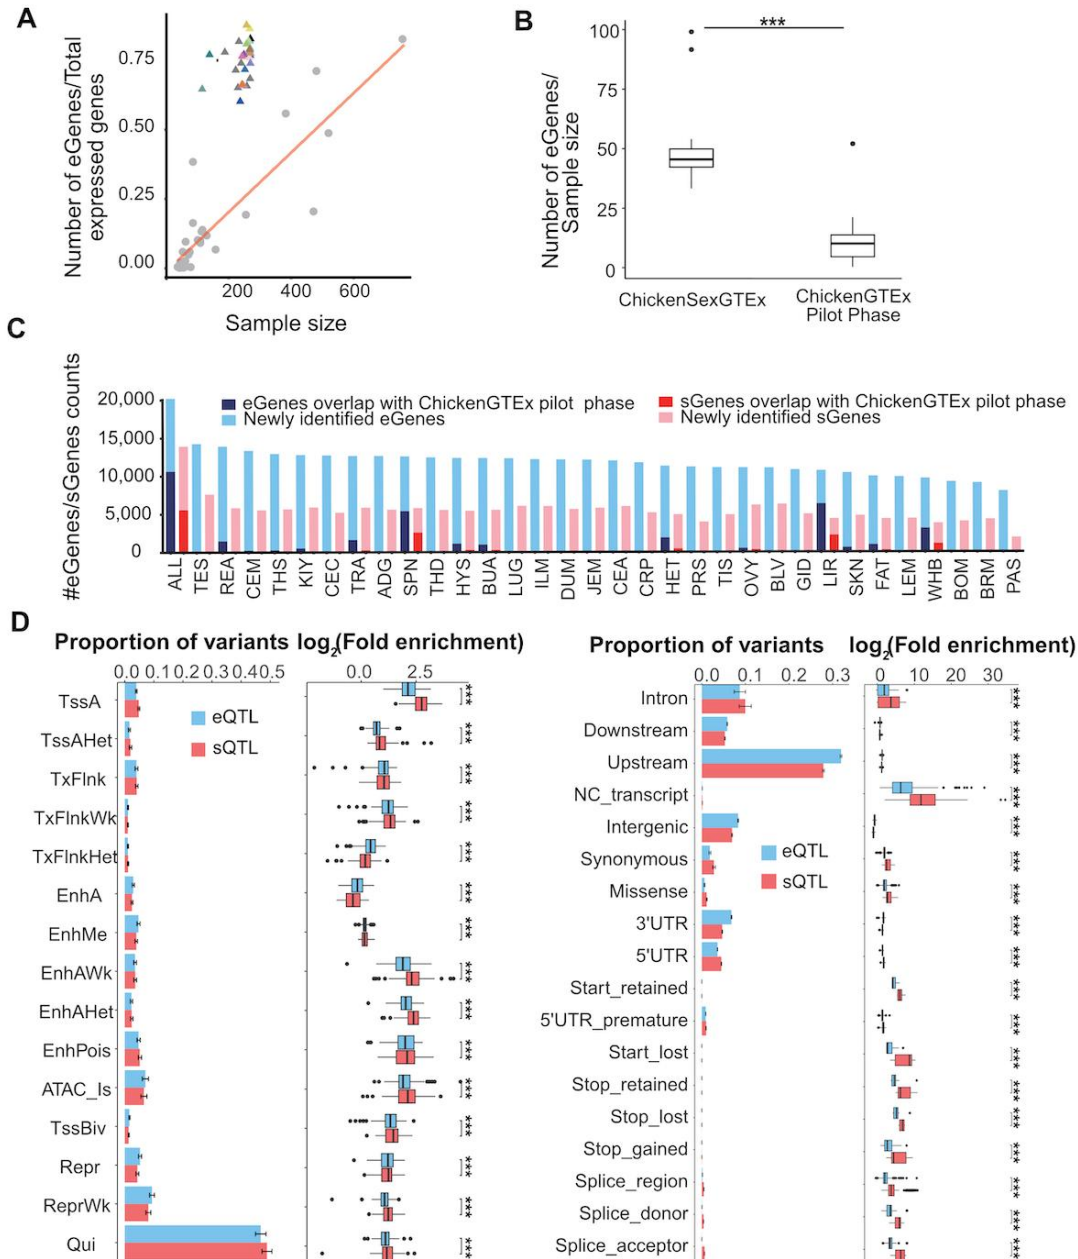

**Supplementary Fig. 8. Comparative analysis of eGene/sGene detection power across studies**  
**(A)** Number of eGenes per expressed gene detected in the ChickenSexGTEx cohort, plotted against results from ChickenGTEx pilot phase. Colored triangles represent ChickenSexGTEx data; grey dots represent ChickenGTEx pilot phase data. The red regression line is modeled on sample size and eGene count per expressed gene from the pilot phase. **(B)** Comparison of eGene count per sample size between ChickenGTEx pilot phase and ChickenSexGTEx. **(C)** Summary of eGene and sGene counts identified in ChickenGTEx pilot phase and ChickenSexGTEx. **(D)** Enrichment analysis of independent eQTL and sQTL in annotated functional elements (left panel) and genomic regions (right panel) across the chicken genome.

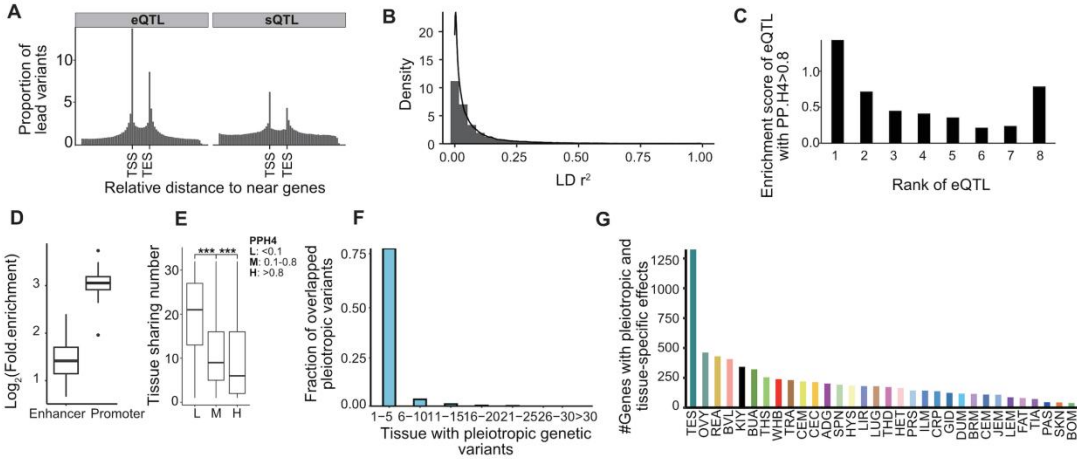

**Supplementary Fig. 9. Colocalization of eQTL and sQTL, and characterization of pleiotropic regulatory variants**

(A) Proportion of leading eQTL and sQTL plotted against their distance to the TSS and TES of target genes. (B) Density distribution of LD between leading eQTL and sQTL. (C) Enrichment of pleiotropic regulatory variants across eQTL significance ranks. (D) Enrichment of pleiotropic regulatory variants in functionally annotated enhancers and promoters. (E) Number of shared tissues for eQTLs stratified by colocalization probability with sQTLs: low (PP.H4 < 0.1), median (0.1 < PP.H4 < 0.8), and high (PP.H4 > 0.8). (F) Tissue-sharing pattern of pleiotropic regulatory variants. (G) Tissue distribution of tissue-specific pleiotropic variants.

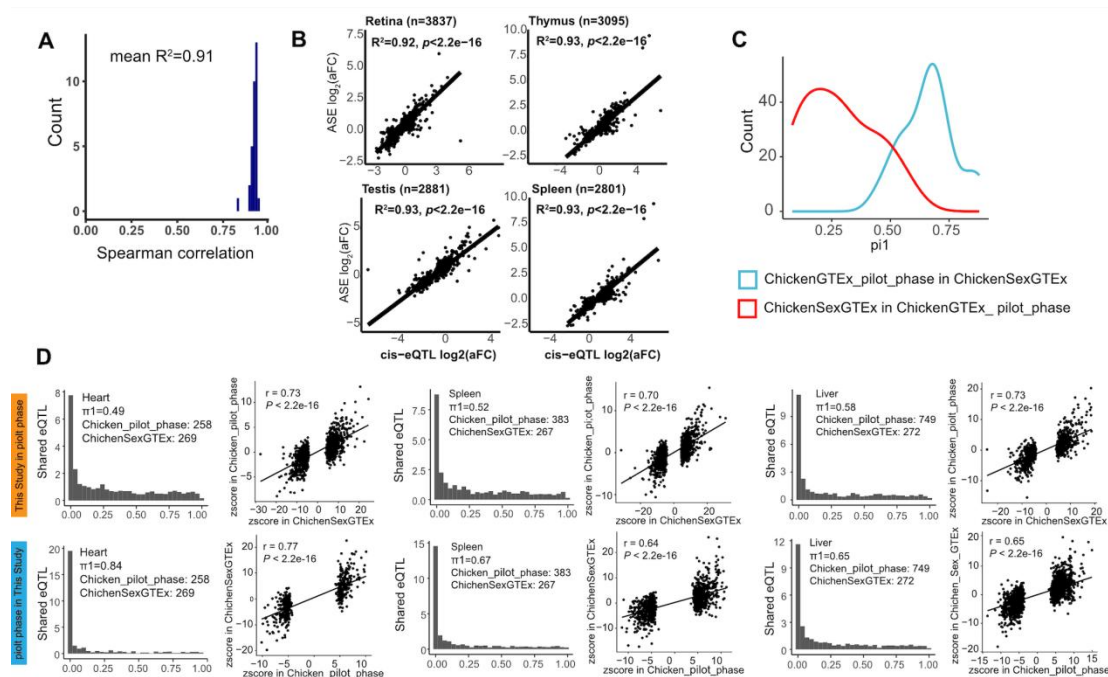

**Supplementary Fig. 10. Validation of eQTL across ChickenGTEx pilot phase**

(A) Spearman's correlation of eQTL effect sizes estimated via allele-specific expression (ASE) and linear mixed model. (B) Concordance of eQTL and ASE effect sizes in representative tissues. (C) Cross-validation of eQTL between ChickenSexGTEx cohort and ChickenGTEx pilot phase study. (D) eQTL replication rates in the ChickenGTEx pilot phase<sup>1</sup> (top panel) and

ChickenSexGTEx cohort (bottom panel) for heart (left), spleen (middle), and liver (right) tissues. Histograms show the distribution of  $P$  values for shared eQTL between the two studies; scatter plots show the correlation of adjusted effect sizes for shared eQTL.

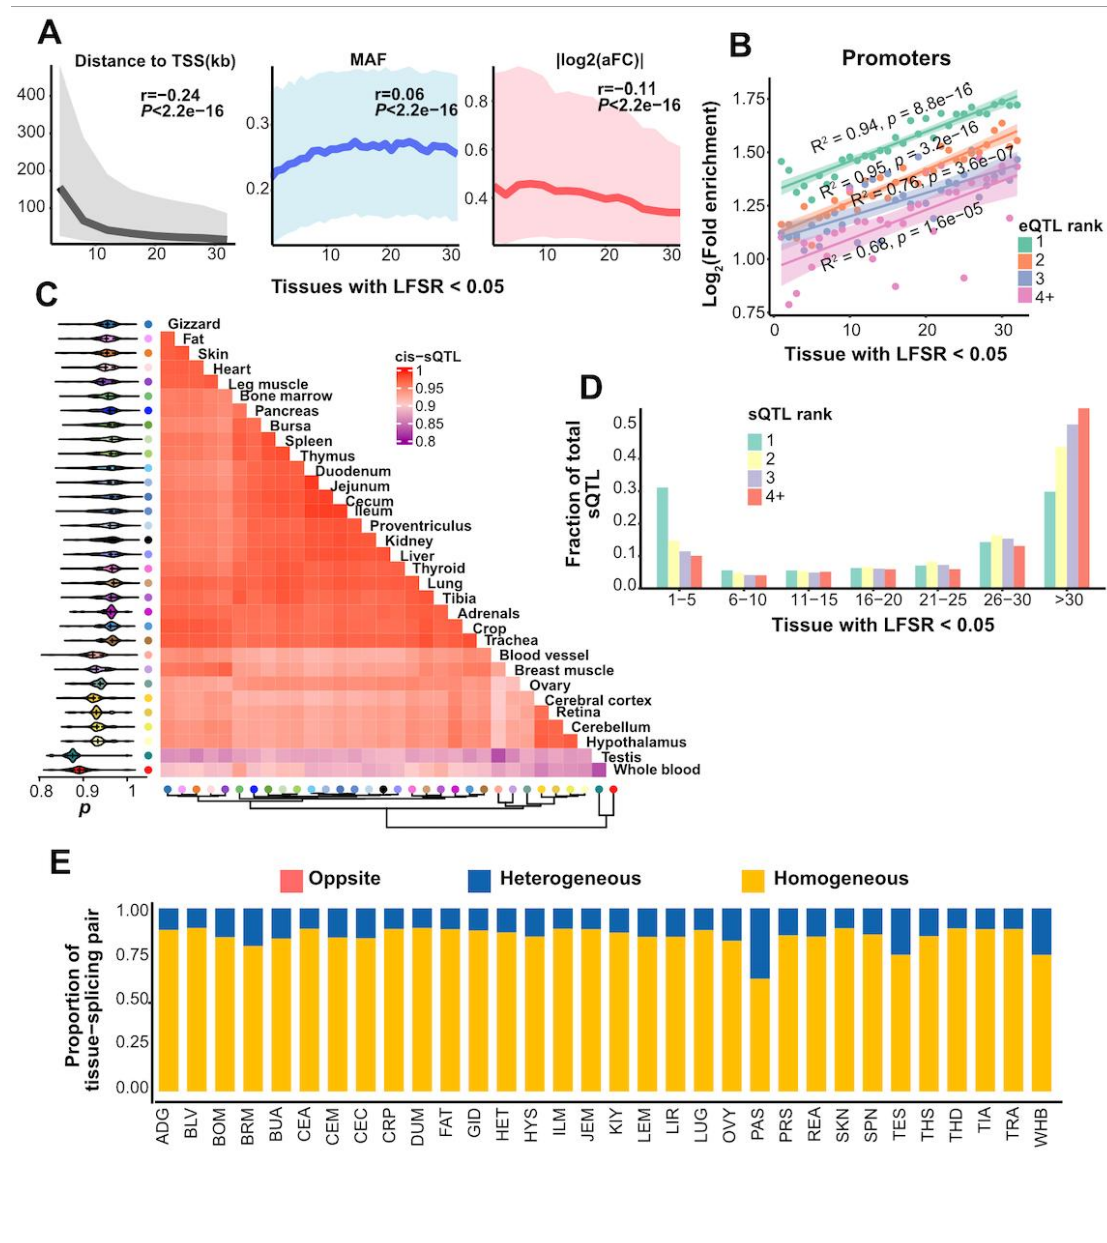

**Supplementary Fig. 11. Characterization of tissue-sharing patterns and regulatory features of sQTL**

(A) Distance to TSS, MAF, and effect size of eQTLs stratified by the number of shared tissues. (B) Enrichment of tissue-shared eQTLs (stratified by significance rank) in functionally annotated promoters. Green dots/lines = rank 1 eQTLs; orange = rank 2; blue = rank 3; purple = rank  $\geq 4$ . (C) Pairwise tissue similarity of sQTL effect sizes, quantified via Spearman's rank correlation. Left panel: distribution of correlation values per tissue; bottom panel: hierarchical clustering of tissues based on regulatory similarity. Tissue types are color-coded as specified in Fig. 2E. (D) Fraction of sQTLs shared across varying numbers of tissues (LFSR < 0.05), ranked by

significance from linear mixed models. (E) Classification of leading sQTL effects as opposite (red), heterogeneous (blue), or homogeneous (yellow) across tissues.

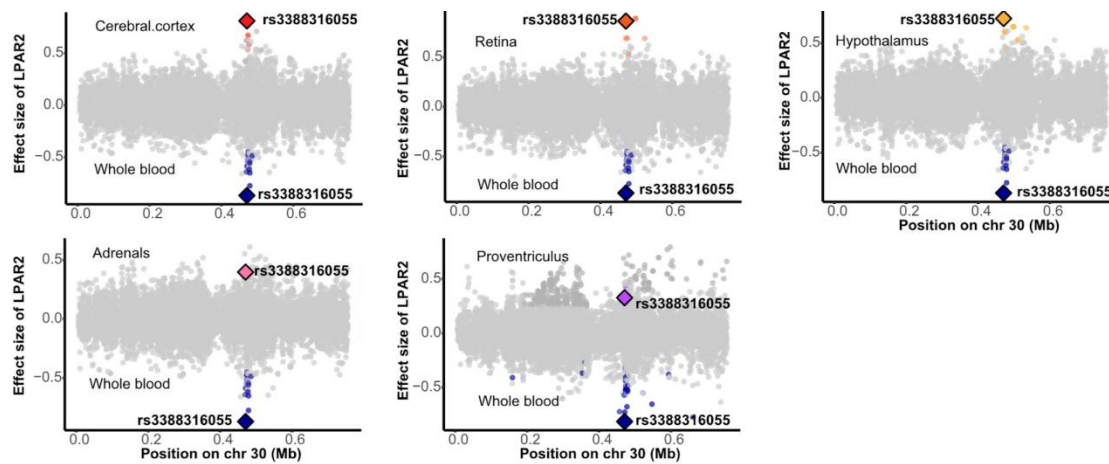

**Supplementary Fig. 12. Tissue-specific regulatory effect of variant *rs3388316055* on *LPAR2* expression in whole blood**

Effect sizes of regional variants regulating *LPAR2* expression in whole blood (bottom panel) and a contrast panel including cerebral cortex, retina, hypothalamus, adrenal gland, and proventriculus (top panel).

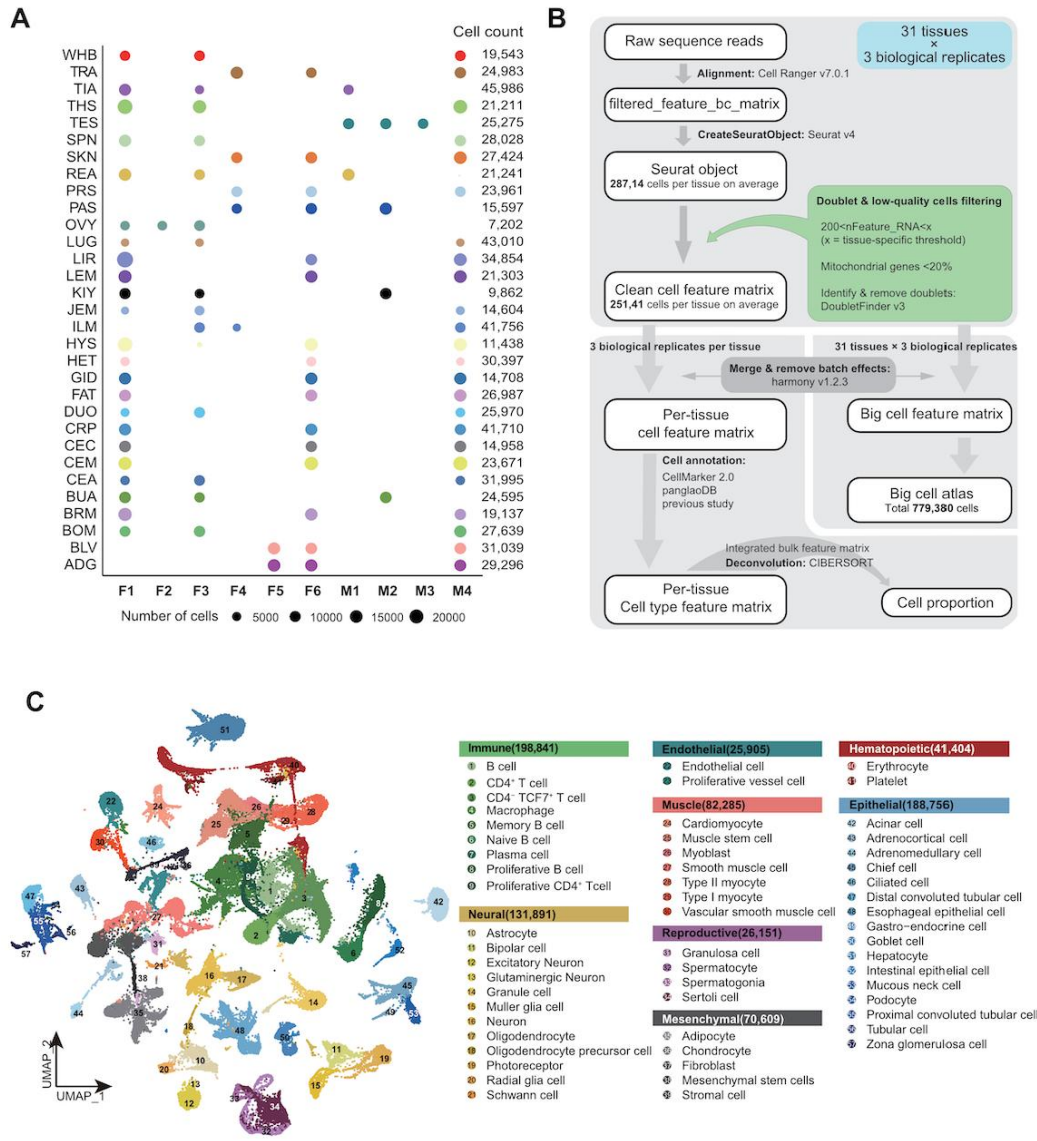

**Supplementary Fig. 13. Sample information and preliminary analysis of sc/snRNAseq data**  
**(A)** Tissue sample collection for sc/snRNAseq. Columns represent chicken individuals (1-6 =female; 7-10 = male). Each tissue includes three biological replicates (two female, one male). Total cell counts per tissue are listed in the right column. **(B)** Workflow of sc/snRNAseq data processing: raw sequence alignment, quality control (doublet removal and low-quality cell filtering), batch effect correction, and data integration for cell proportion deconvolution. **(C)** UMAP of 765,842 single cells/nuclei from 31 tissues, annotated into 57 distinct cell types, and categorized into 8 cell groups.

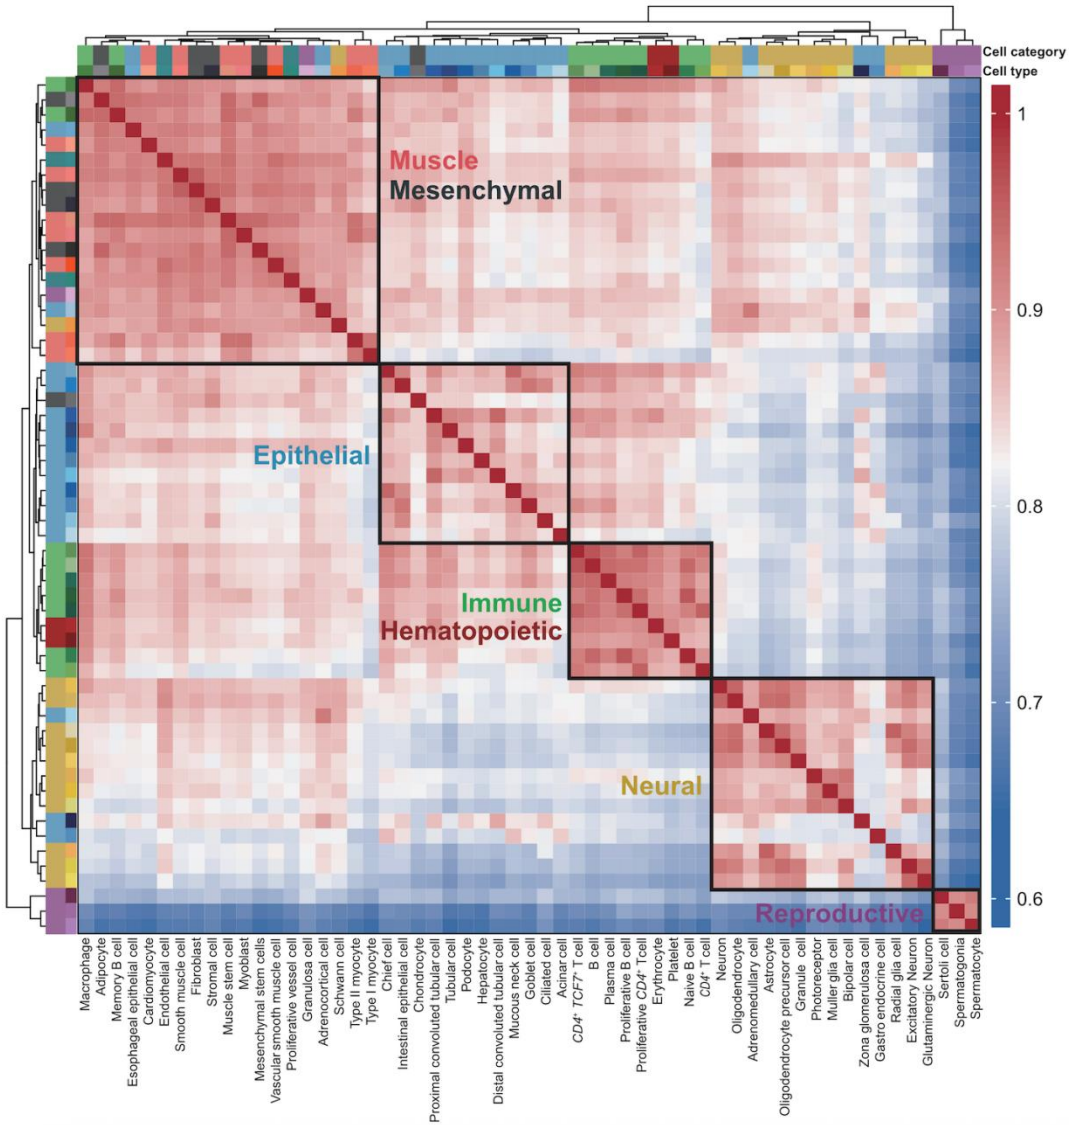

**Supplementary Fig. 14. Transcriptomic similarity heatmap of cell types annotated in the single-cell atlas**

Heatmap showing transcriptomic similarity between cell types defined in Fig. S13C, across 31 tissues.



### Proventriculus

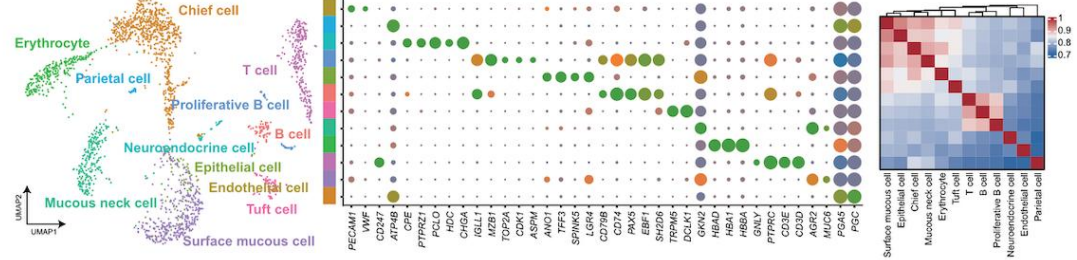

### Gizzard

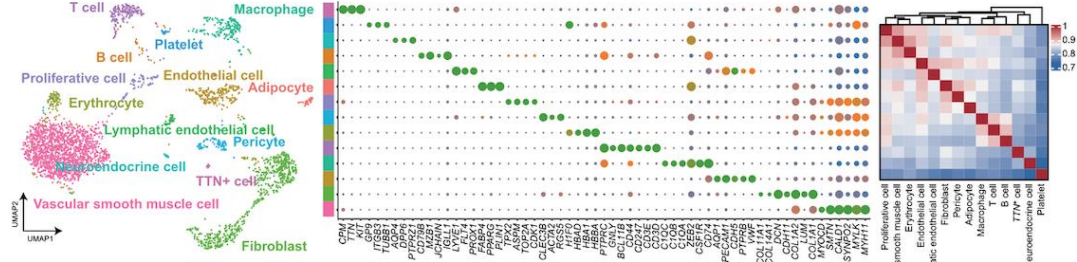

### Liver

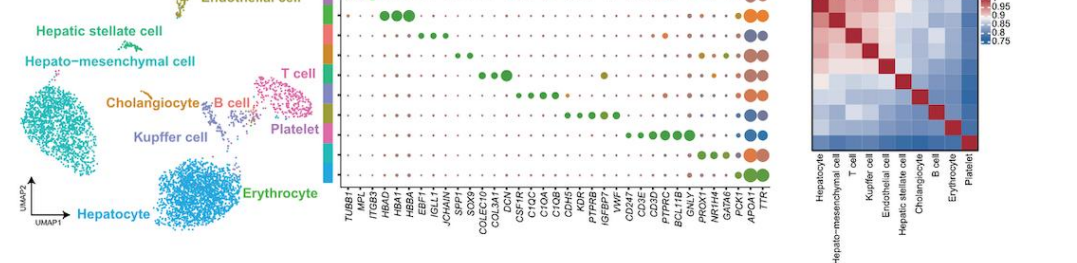

### Pancreas

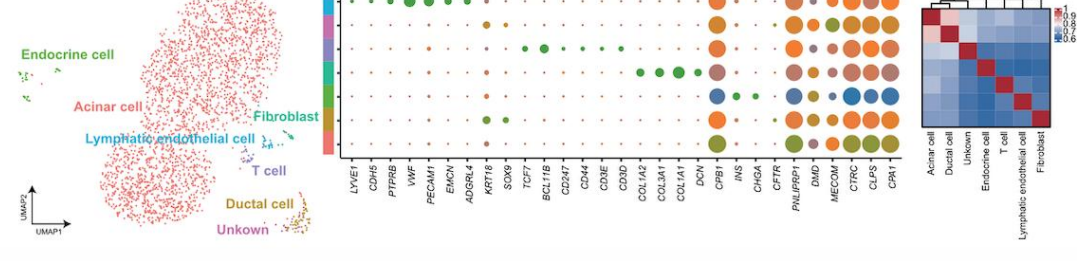



### Duodenum

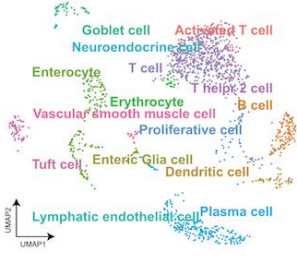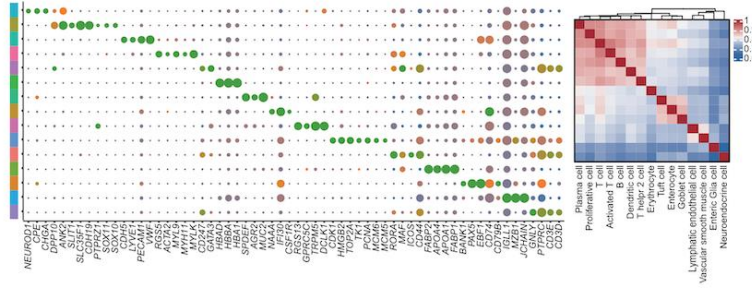

### Jejunum

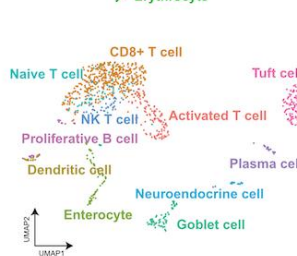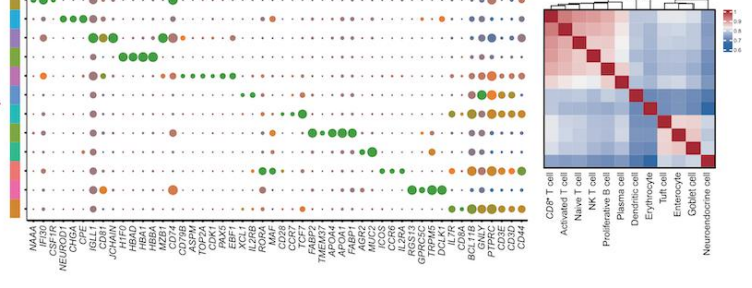

### Ileum

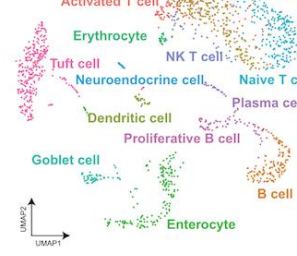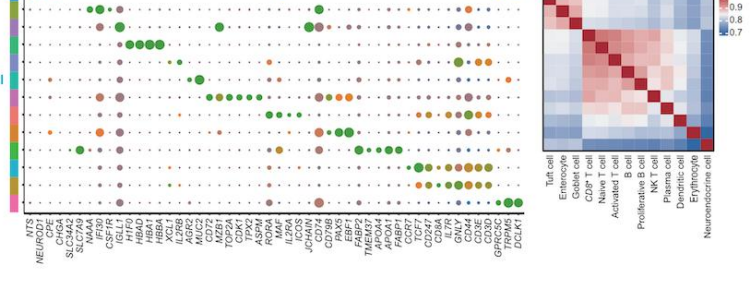

### Bursa

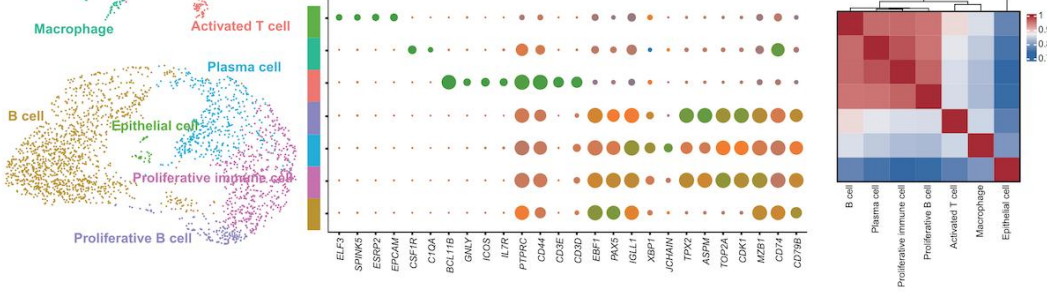

### Spleen

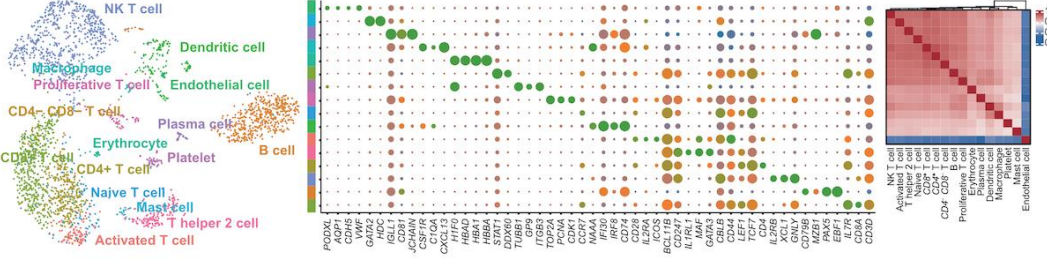

### Bone marrow

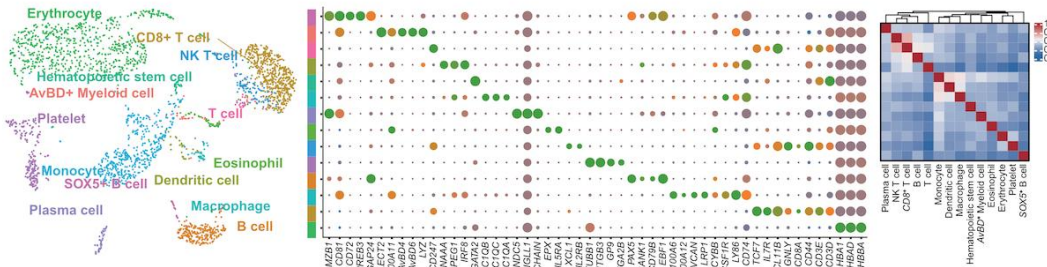

### Thymus

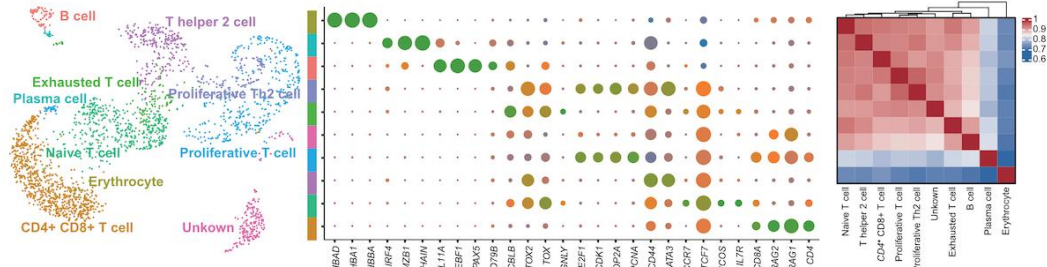

### Fat

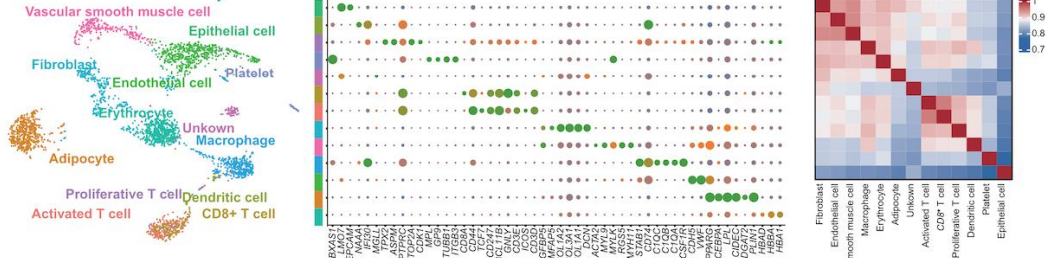

### Adrenals

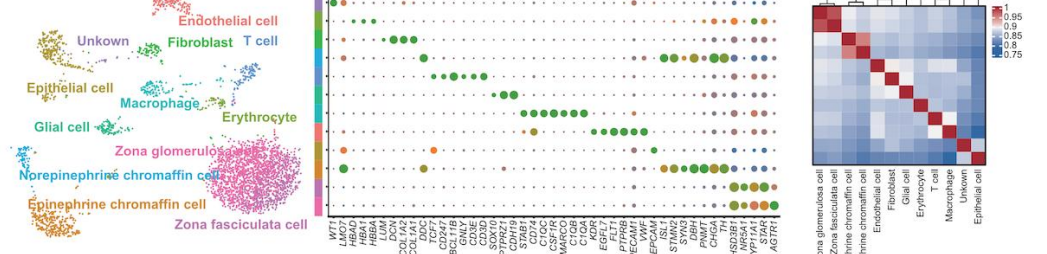

### Kidney

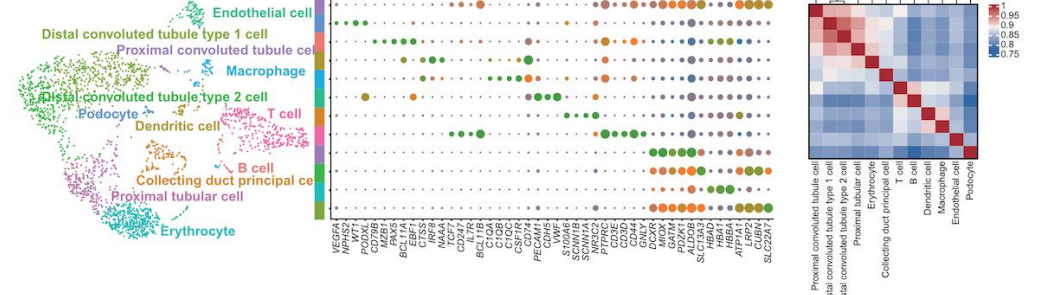

### Skin

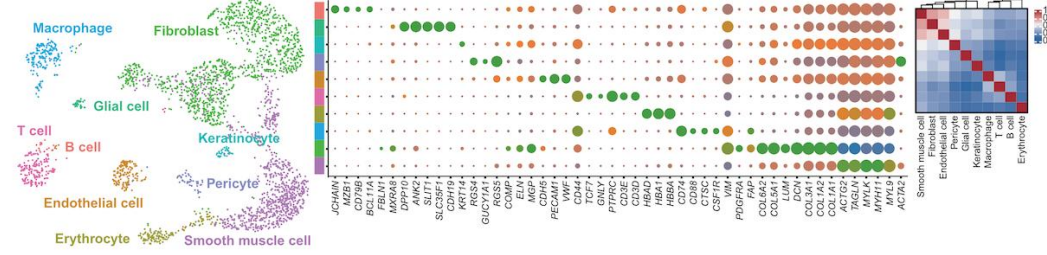

### Testis

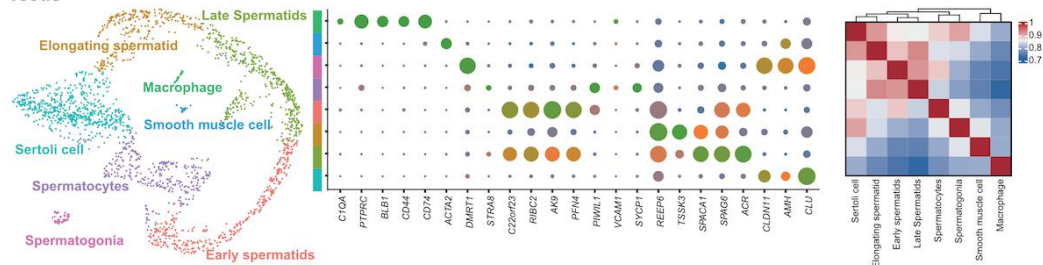

### Ovary

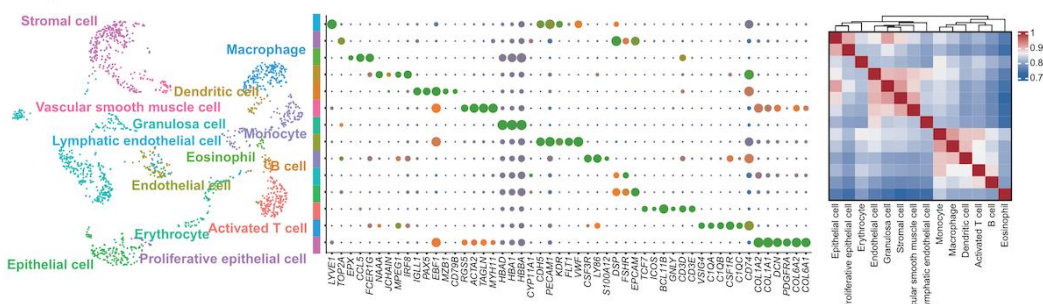

### Breast muscle

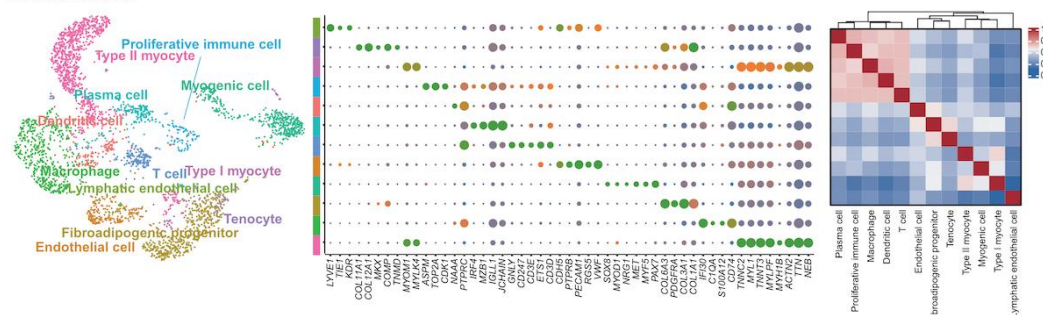

### Leg muscle

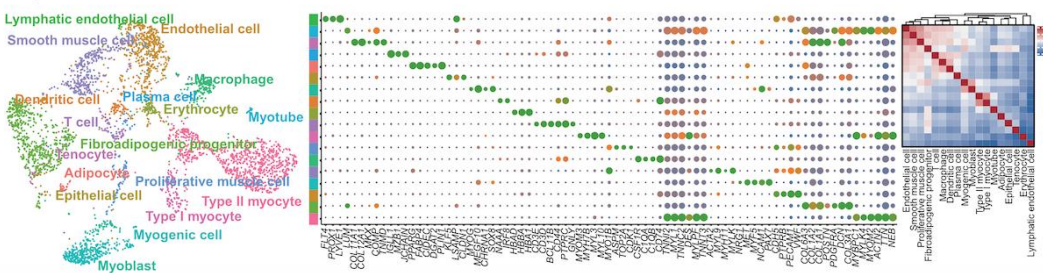

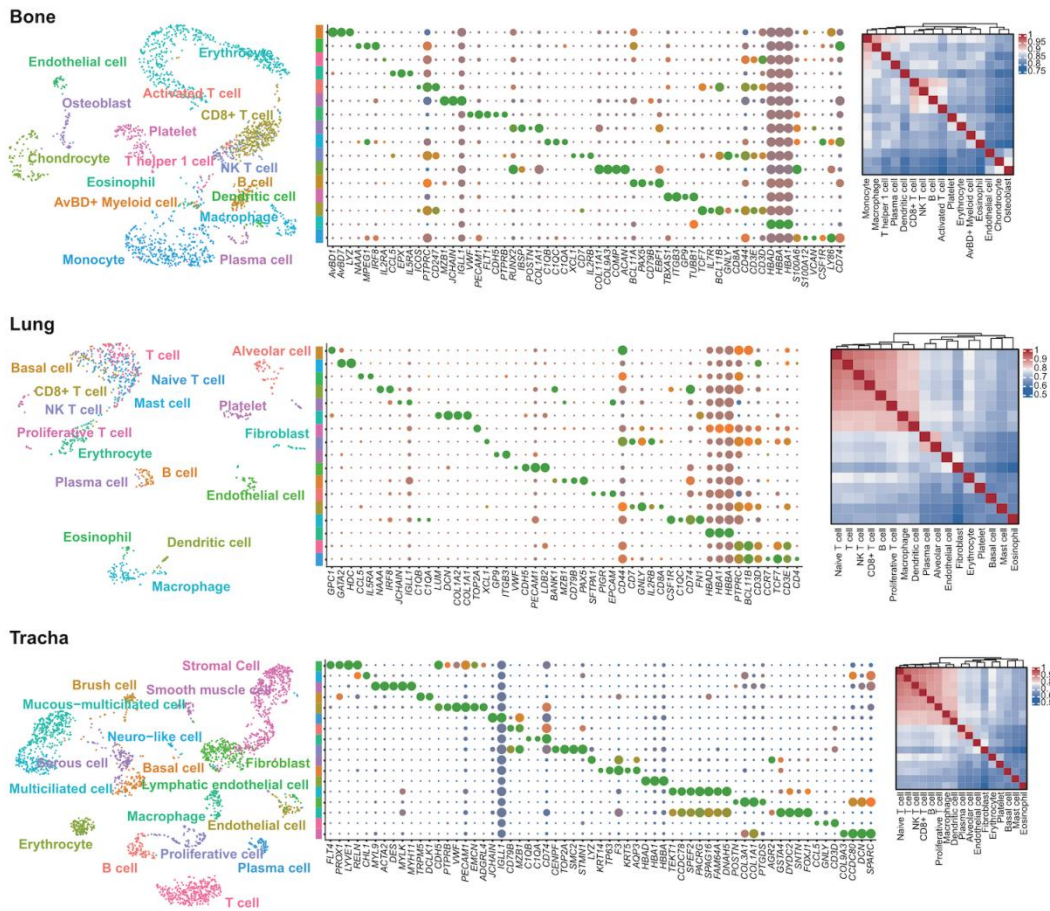

**Supplementary Fig. 15 to 22. Single-cell atlas characterization for 31 tissues**  
 For each tissue: UMAP projection of cells (left panel), annotated by marker gene expression (middle panel); transcriptomic similarity of cell types defined in the tissue (right panel).

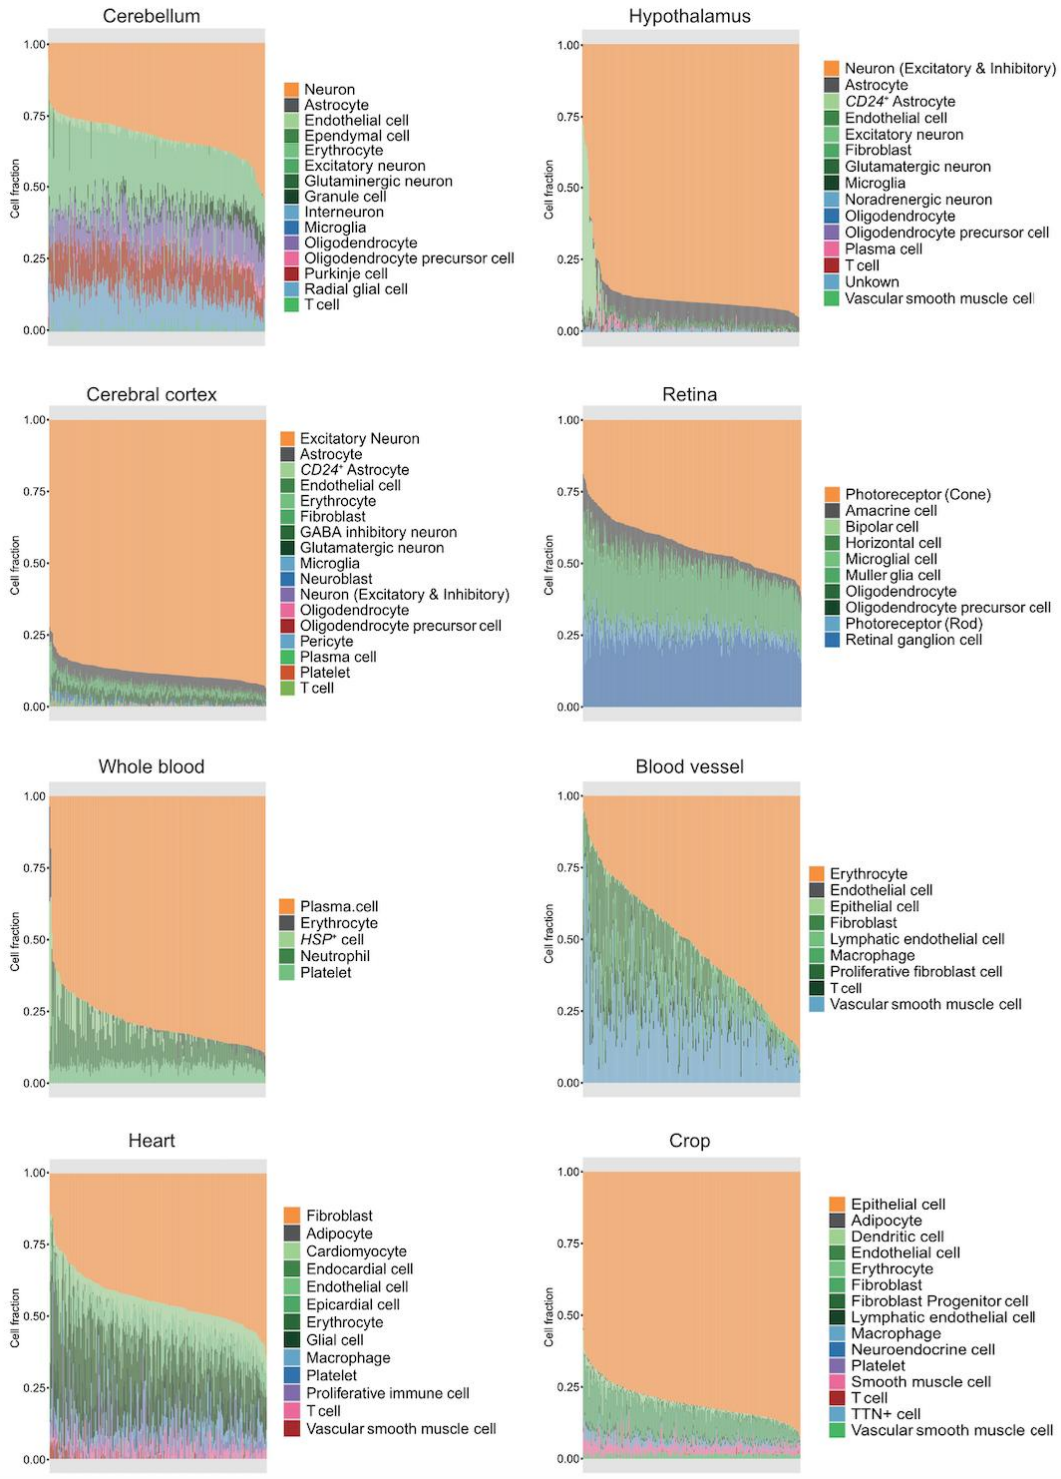

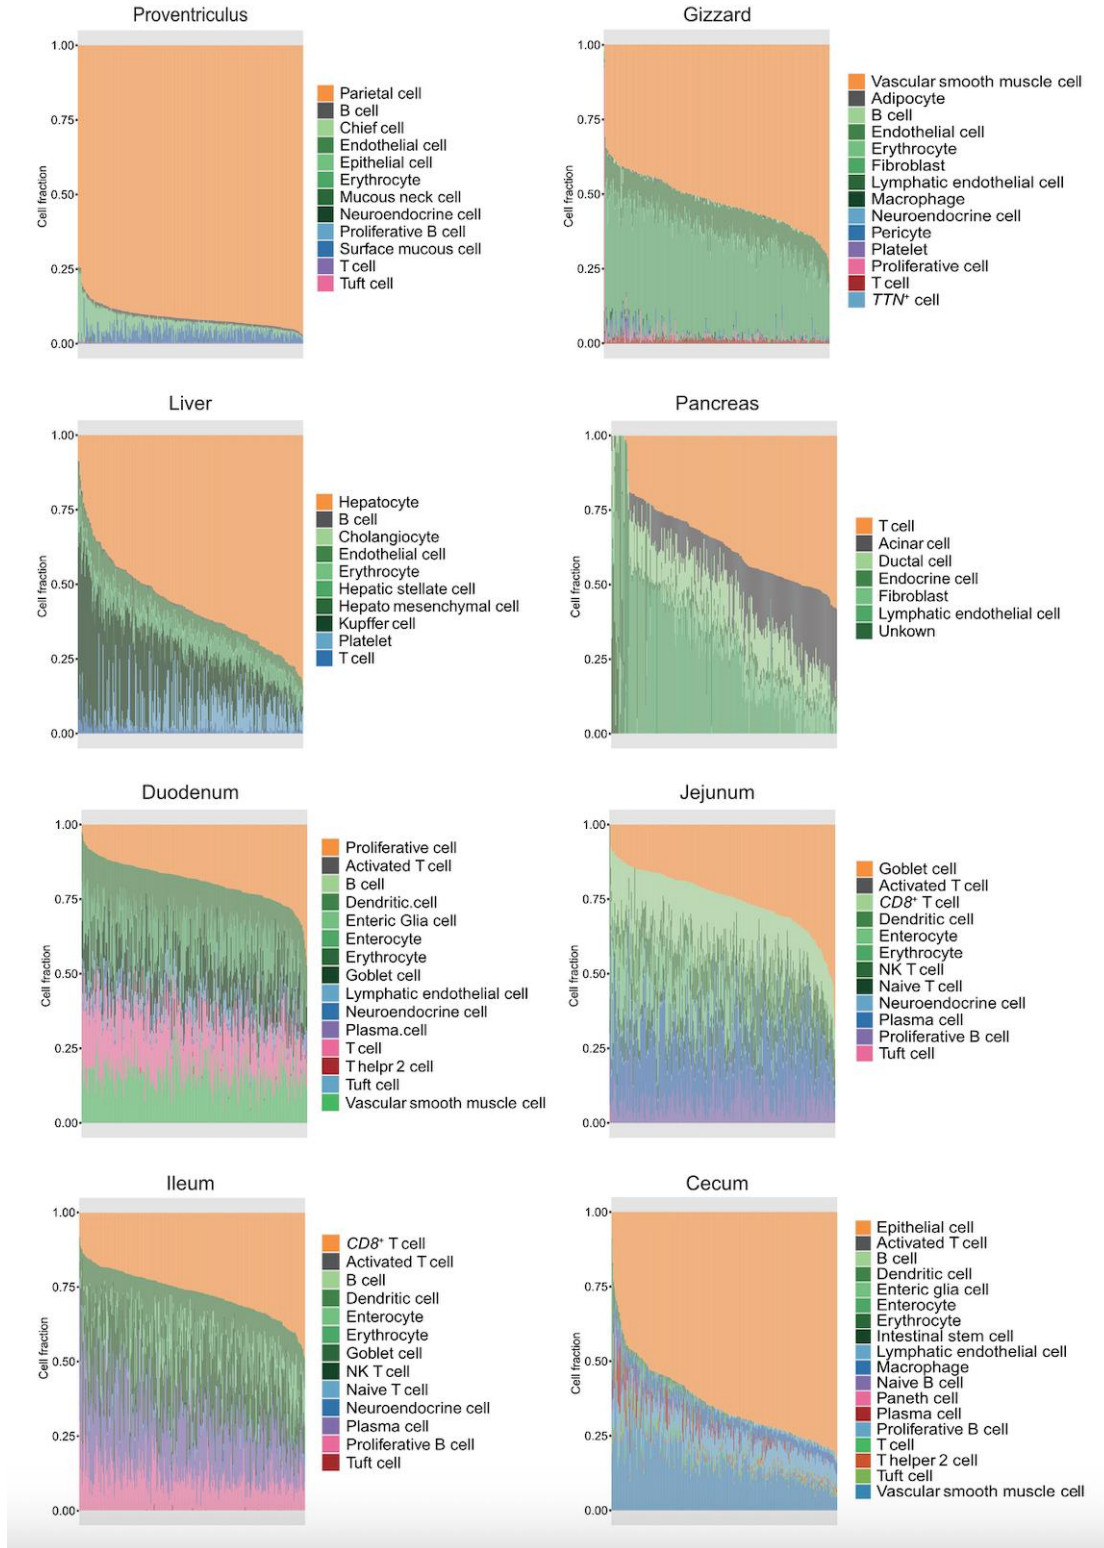

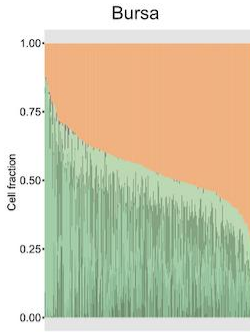

- Plasma cell
- Activated T cell
- B cell
- Epithelial cell
- Macrophage
- Proliferative B cell
- Proliferative immune cell

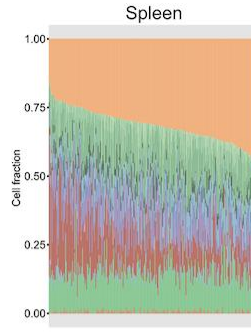

- Dendritic cell
- Activated T cell
- B cell
- CD4+ T cell
- CD4+ CD8- T cell
- CD8+ T cell
- Endothelial cell
- Erythrocyte
- Macrophage
- Mast cell
- NK T cell
- Naive T cell
- Plasma cell
- Platelet
- Proliferative T cell
- T helper 2 cell

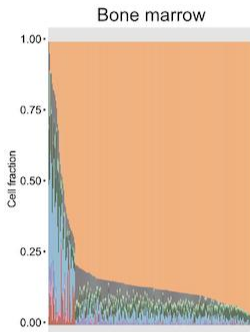

- Erythrocyte
- AvBD+ Myeloid cell
- B cell
- CD8+ T cell
- Dendritic cell
- Eosinophil
- Hematopoietic stem cell
- Macrophage
- Monocyte
- NK T cell
- Plasma cell
- Platelet
- SOX5+ B cell
- T cell

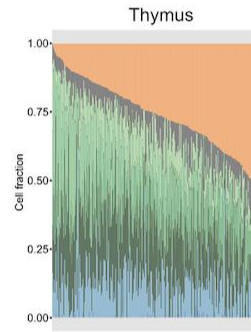

- Exhausted T cell
- B cell
- CD4+ CD8+ T cell
- Erythrocyte
- Naive T cell
- Plasma cell
- Proliferative T cell
- Proliferative Th2 cell
- T helper 2 cell
- Unkown

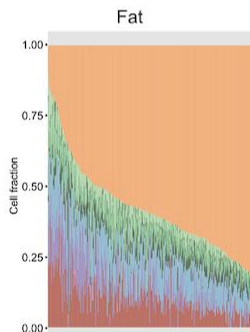

- Fibroblast
- Activated T cell
- Adipocyte
- CD8+ T cell
- Dendritic cell
- Endothelial cell
- Epithelial cell
- Erythrocyte
- Macrophage
- Platelet
- Proliferative T cell
- Unkown
- Vascular smooth muscle cell

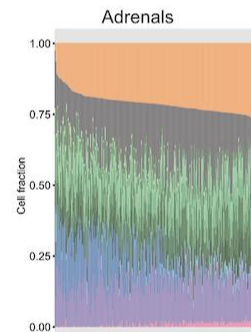

- Endothelial cell
- Epinephrine chromaffin cell
- Epithelial cell
- Erythrocyte
- Fibroblast
- Glial cell
- Macrophage
- Norepinephrine chromaffin cell
- T cell
- Unkown
- Zona fasciculata cell
- Zona glomerulosa cell

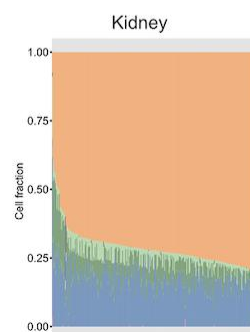

- Collecting duct principal cell
- B cell
- Dendritic cell
- Distal convoluted tubule type 1 cell
- Distal convoluted tubule type 2 cell
- Endothelial cell
- Erythrocyte
- Macrophage
- Podocyte
- Proximal convoluted tubule cell
- Proximal tubular cell
- T cell

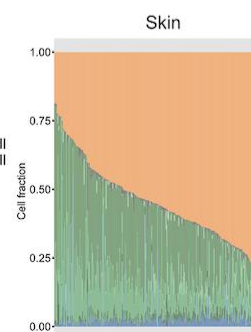

- Endothelial cell
- B cell
- Erythrocyte
- Fibroblast
- Glial cell
- Keratinocyte
- Macrophage
- Percyote
- Smooth muscle cell
- T cell

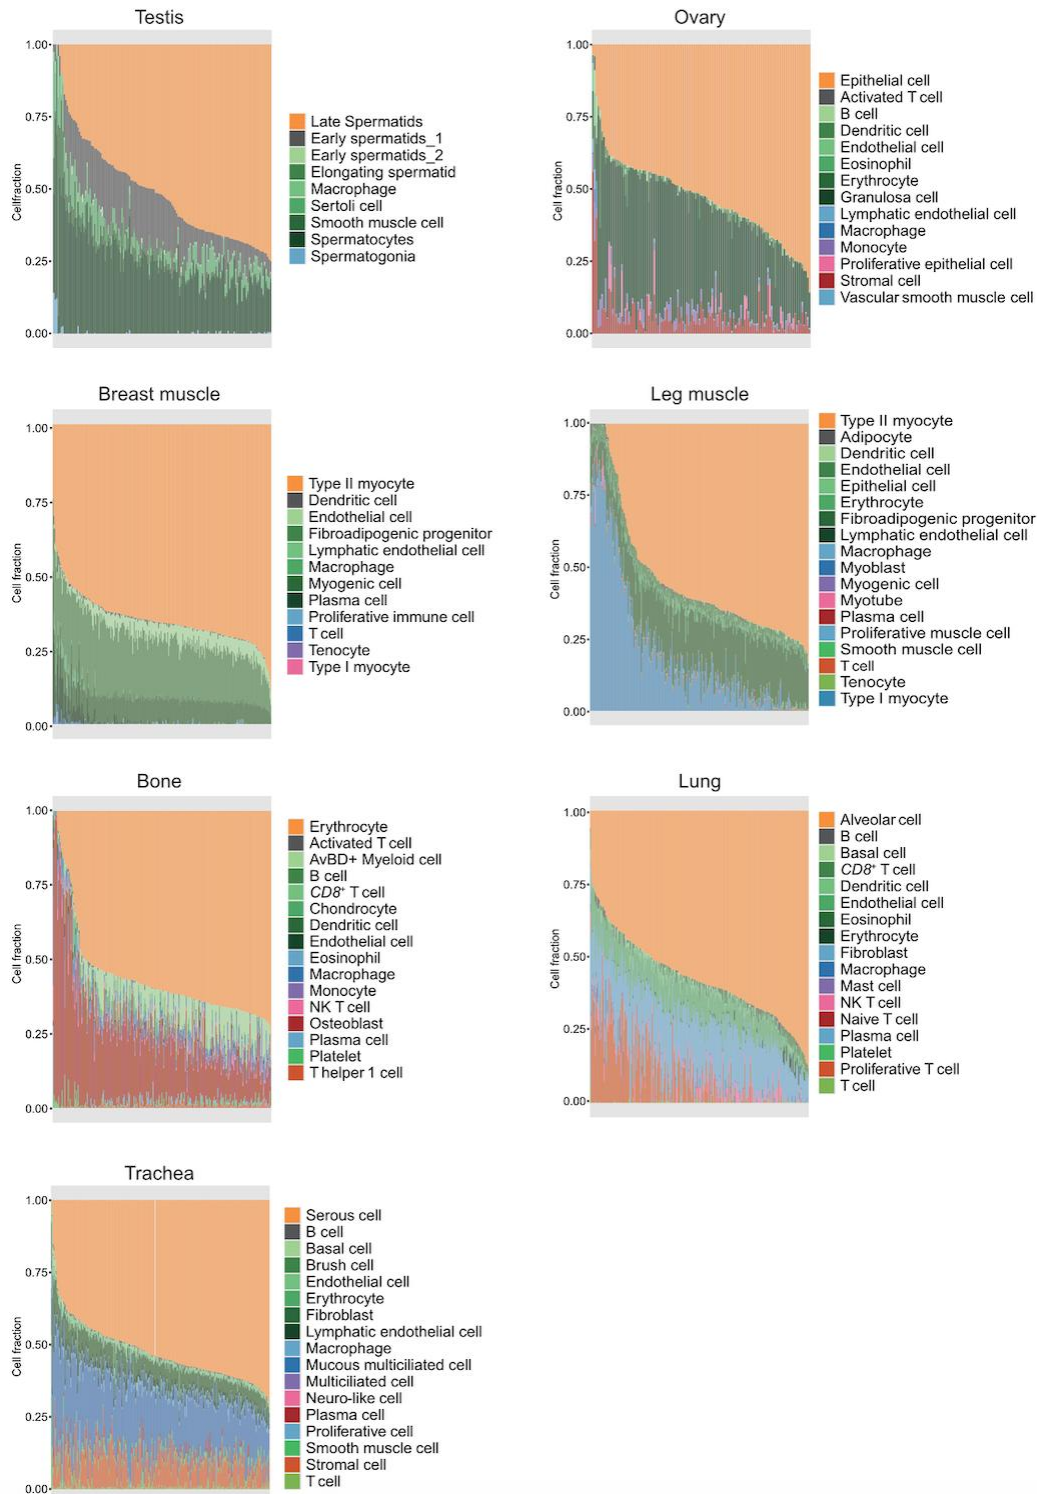

**Supplementary Fig. 23 to 26. Cell type proportion deconvolution across the 280-individual ChickenSexGTEch cohort**

For each tissue: columns represent individual chickens; cell type proportions are color-coded according to the cell type annotations for the tissue.

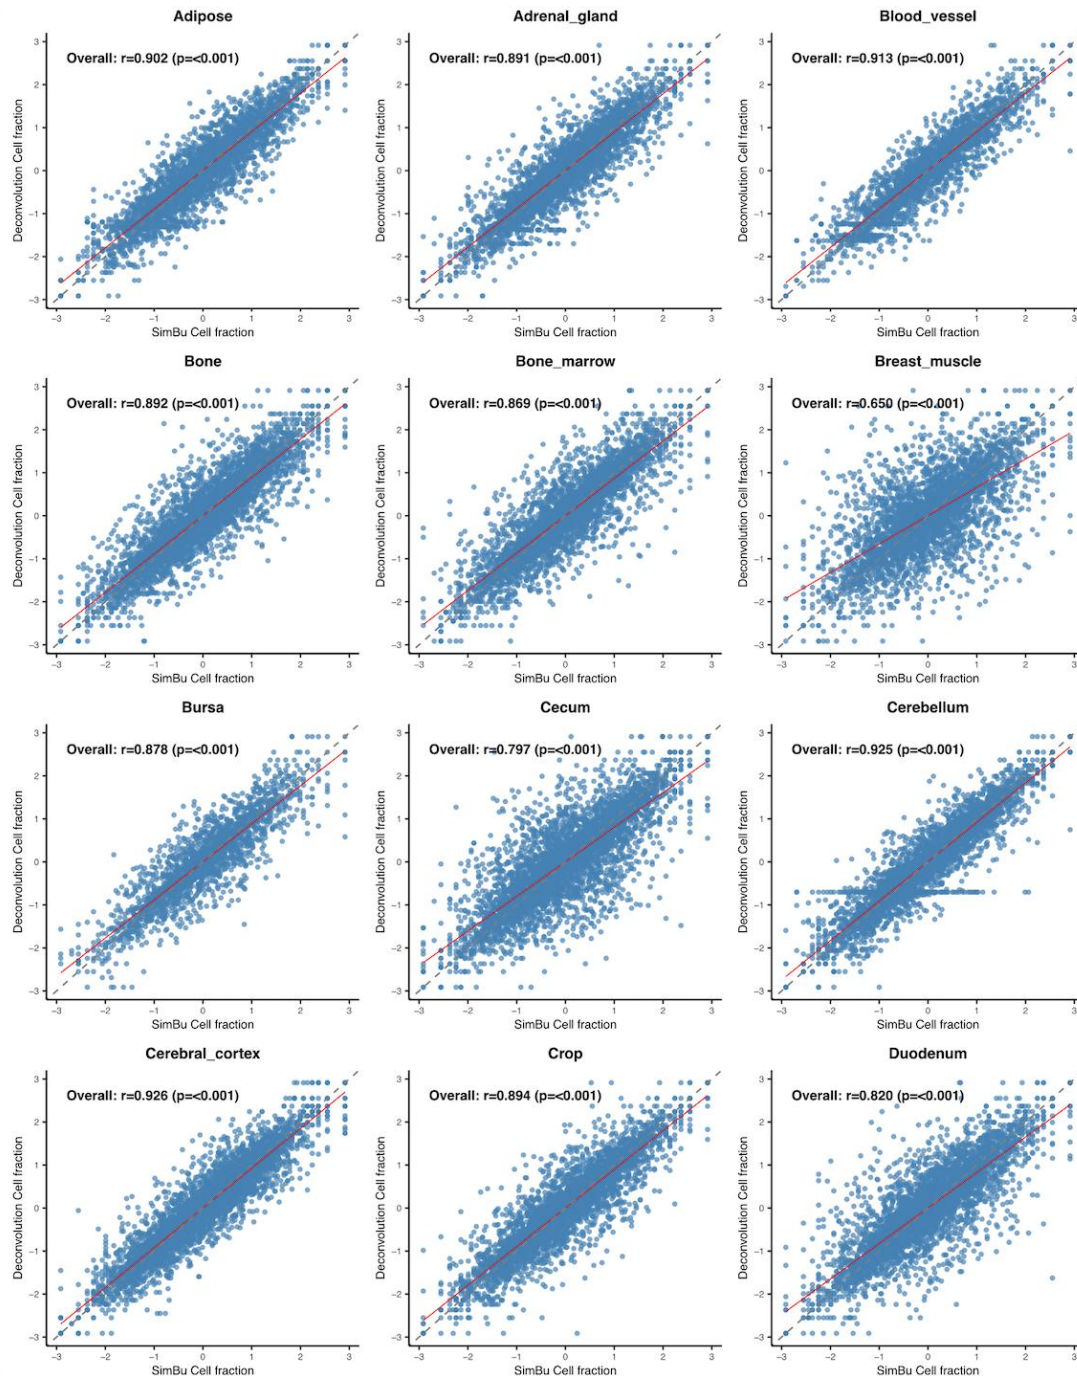

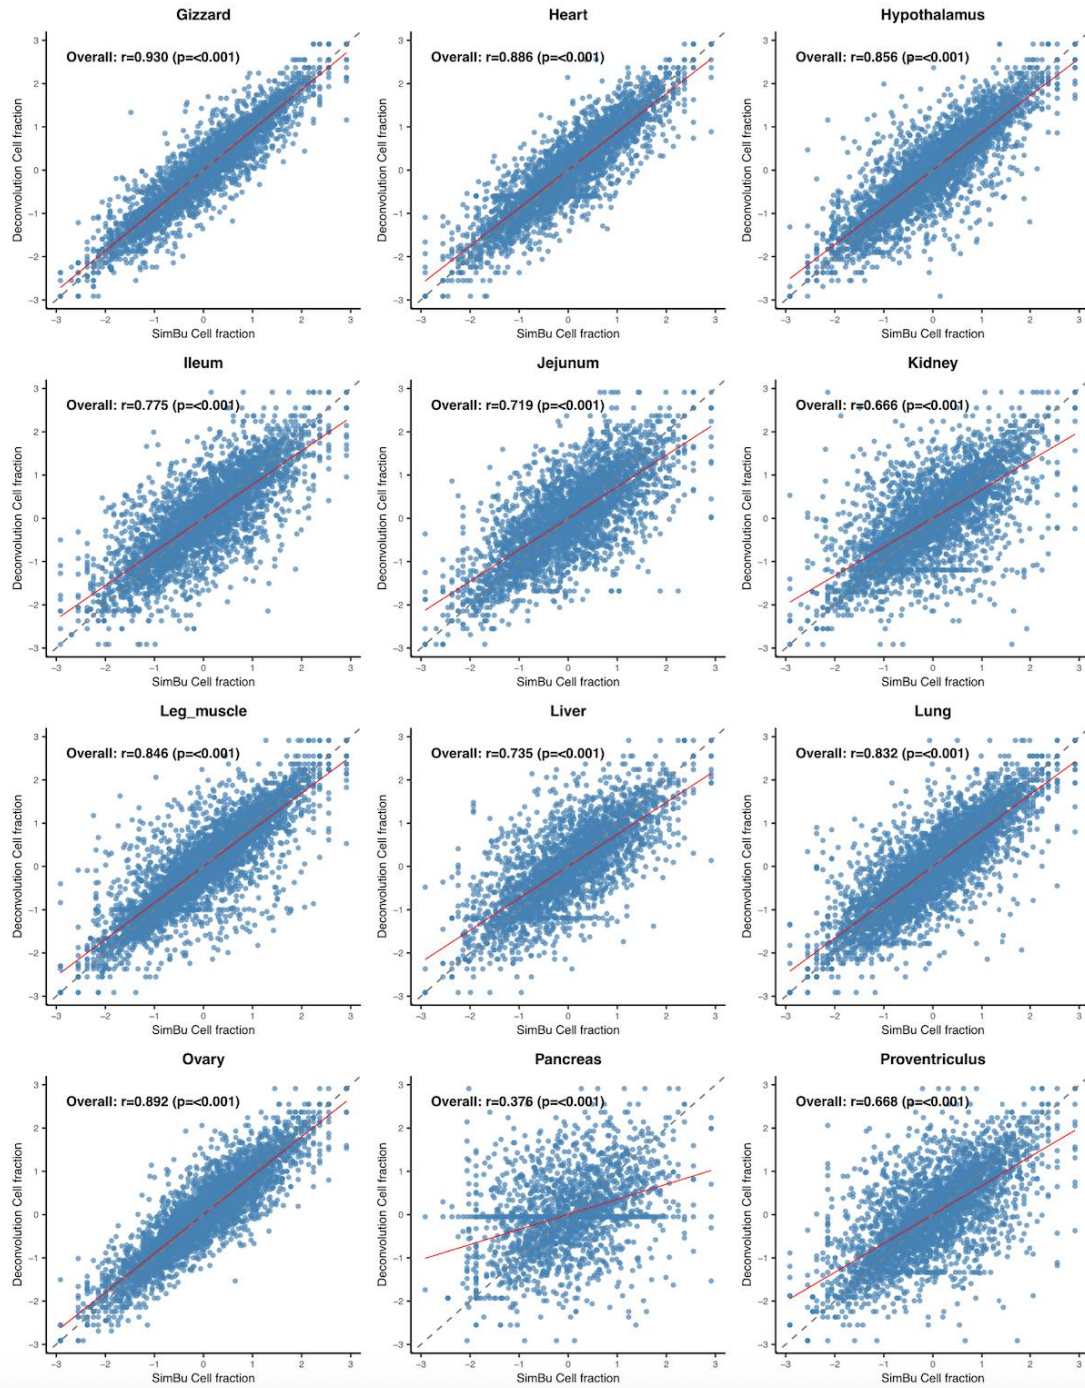

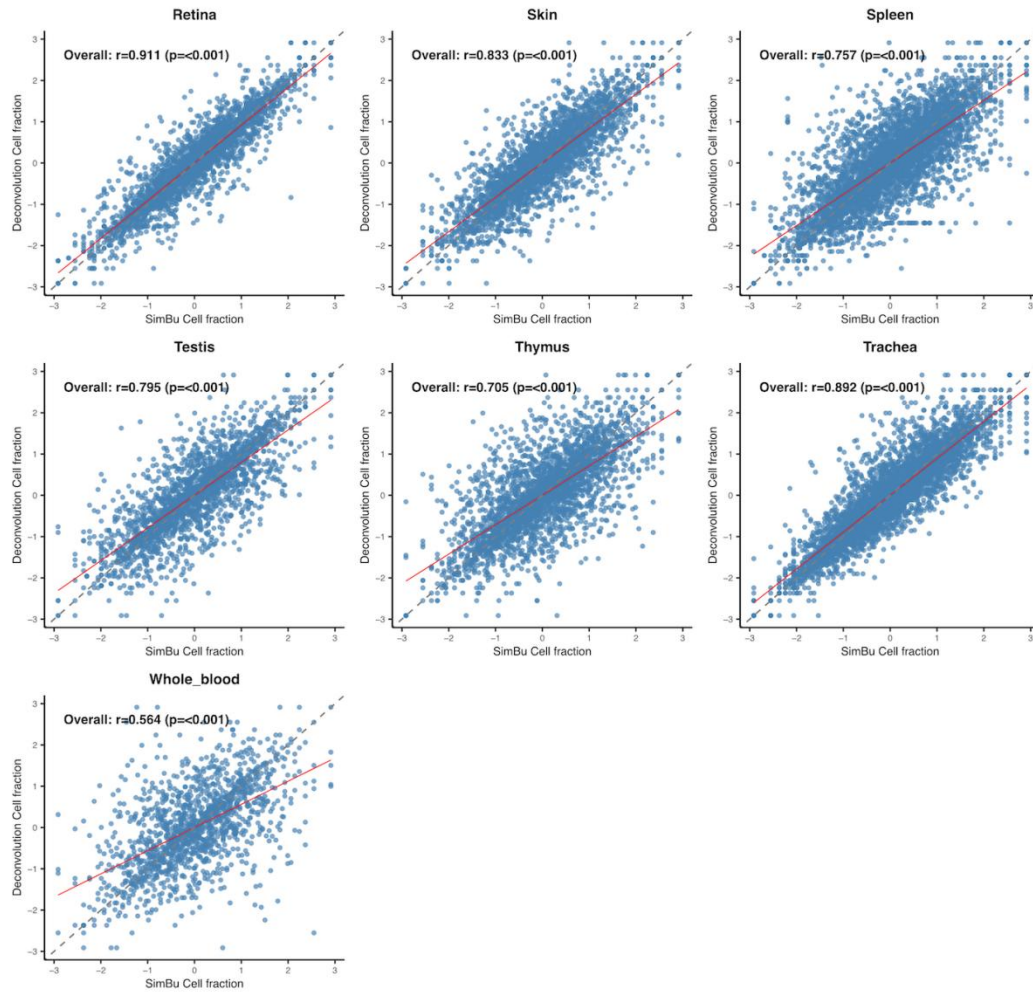

**Supplementary Fig. 27 to 29. Validation of cell fraction deconvolution accuracy**  
 Pearson's correlation between deconvoluted cell fractions and true cell fractions from simulated scRNA-seq data. Simulations were performed using SimBu<sup>2</sup> (1.2.0) software.

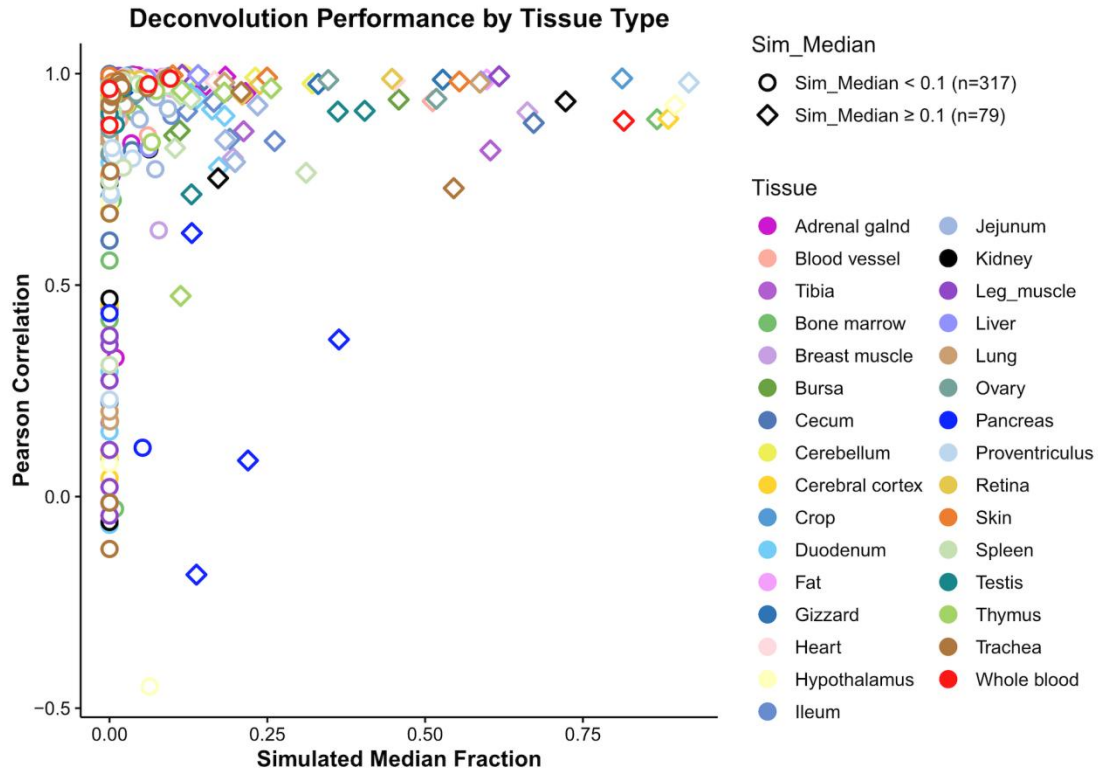

**Supplementary Fig. 30. Correlation between median cell fraction and deconvolution accuracy**

Scatter plot showing the relationship between median cell fraction and deconvolution accuracy for 127 cell types.

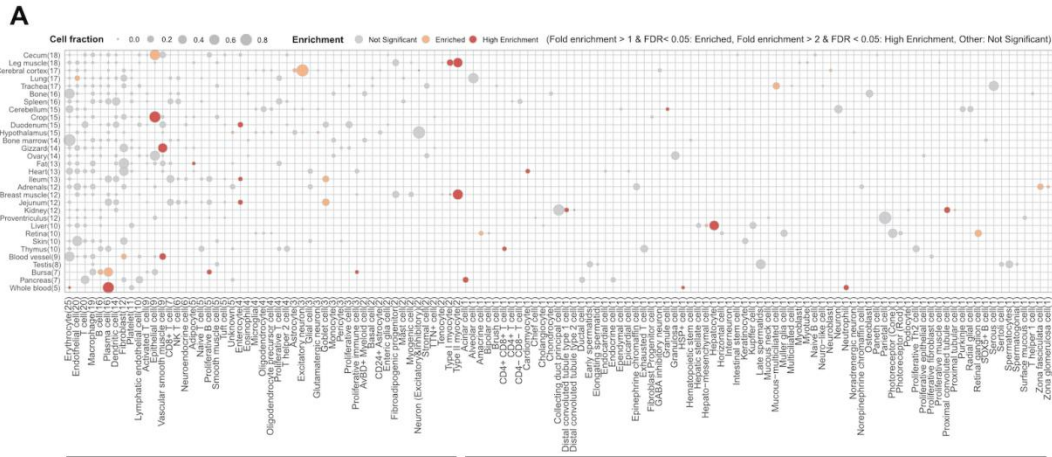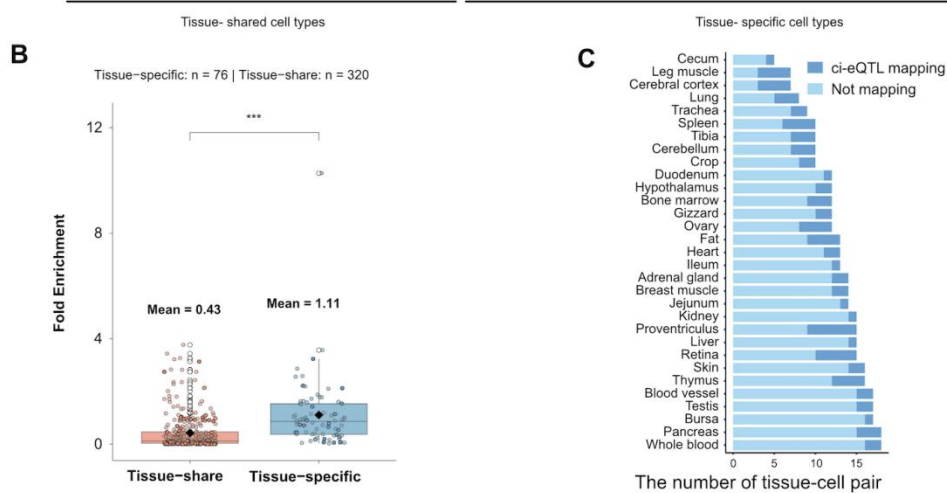

**Supplementary Fig. 31. Enrichment analysis of tissue-specific genes and cell type marker genes**

(A) Enrichment of tissue-specific genes and same-tissue cell type marker genes. Grey dots = non-significant enrichment; colored dots = significant enrichment. Cell types are ordered by tissue-shared versus tissue-specific classification. (B) Summary of tissue-specific gene enrichment by marker genes from tissue-specific versus tissue-shared cell types. (C) Number of tissue-cell type pair used for cieQTL mapping.

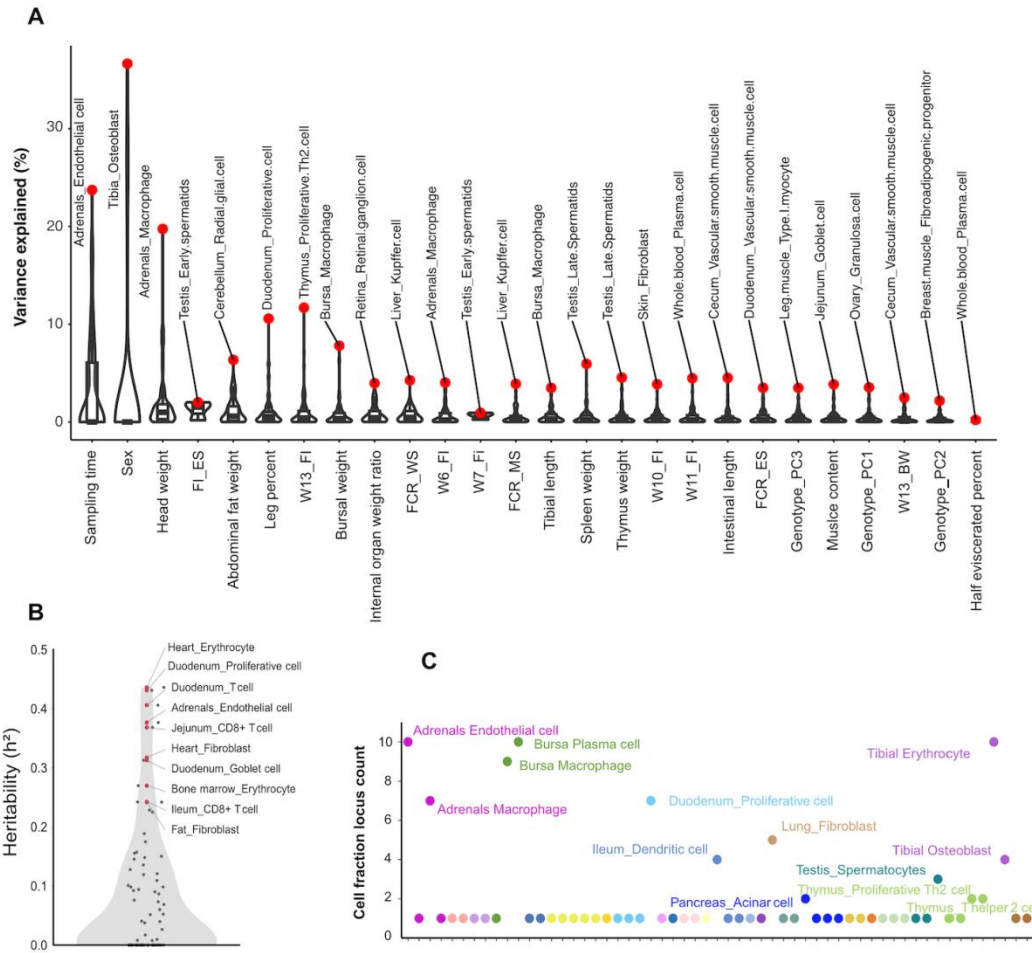

**Supplementary Fig. 32. Characterization of factors influencing cell type proportions**  
**(A)** Variance analysis of 26 recorded metadata attributes explained by the cell type proportions, quantified using ANOVA. Red dots represent cell types explaining the highest variance for each metadata. **(B)** Heritability estimated for 79 cell type fractions from 280 ChickenSexGTEX cohort. **(C)** Summary of GWAS loci associated with 79 cell type fractions. Tissue types are color-coded as specified in Fig. 2E.

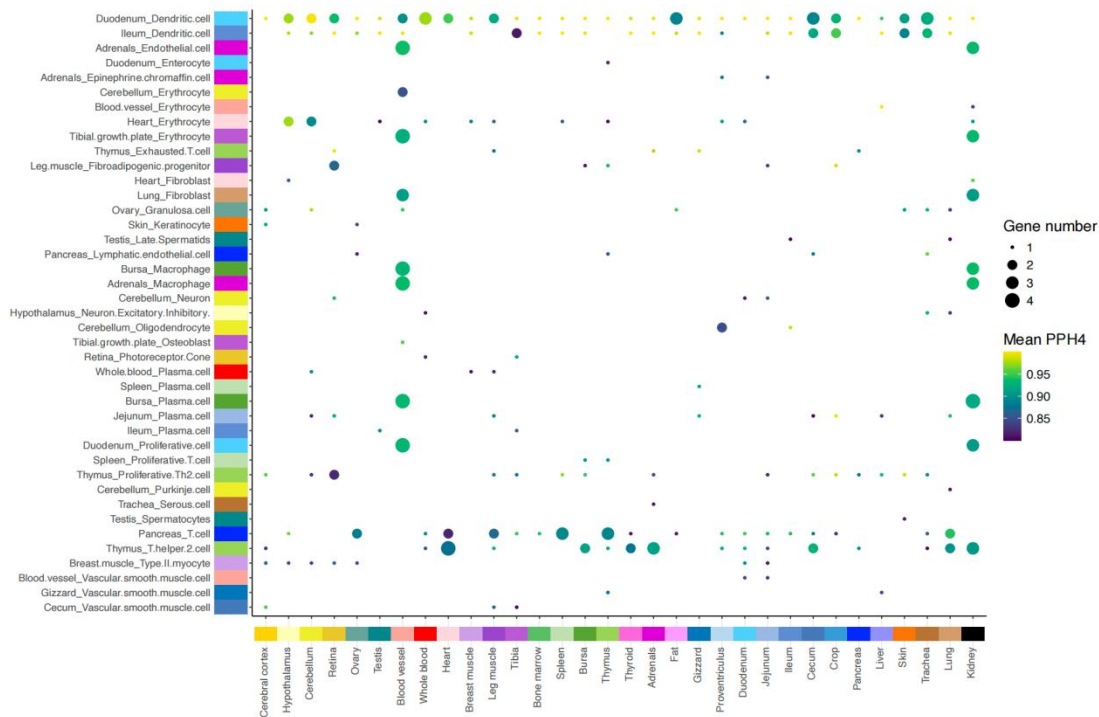

**Supplementary Fig. 33. Colocalization of cell fraction cf-QTL with bulk tissue eQTL**  
 Rows represent GWAS loci associated with target cell fractions. Dots denote significant colocalization events ( $PP.H4 > 0.8$ ). Dot size and darkness correspond to the number of colocalized genes and average PP.H4 value, respectively. Tissue types are color-coded as specified in Fig. 2E.



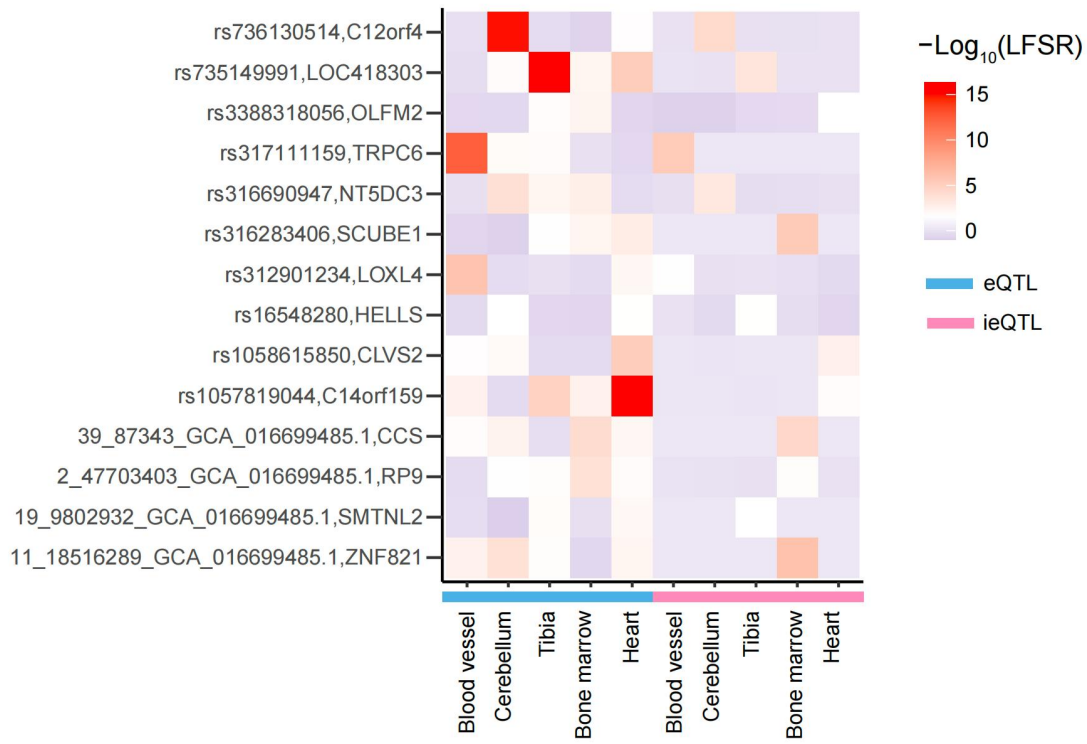

**Supplementary Fig. 35. Comparative tissue-specificity of variant-mediated gene regulation in erythrocytes versus bulk tissues**

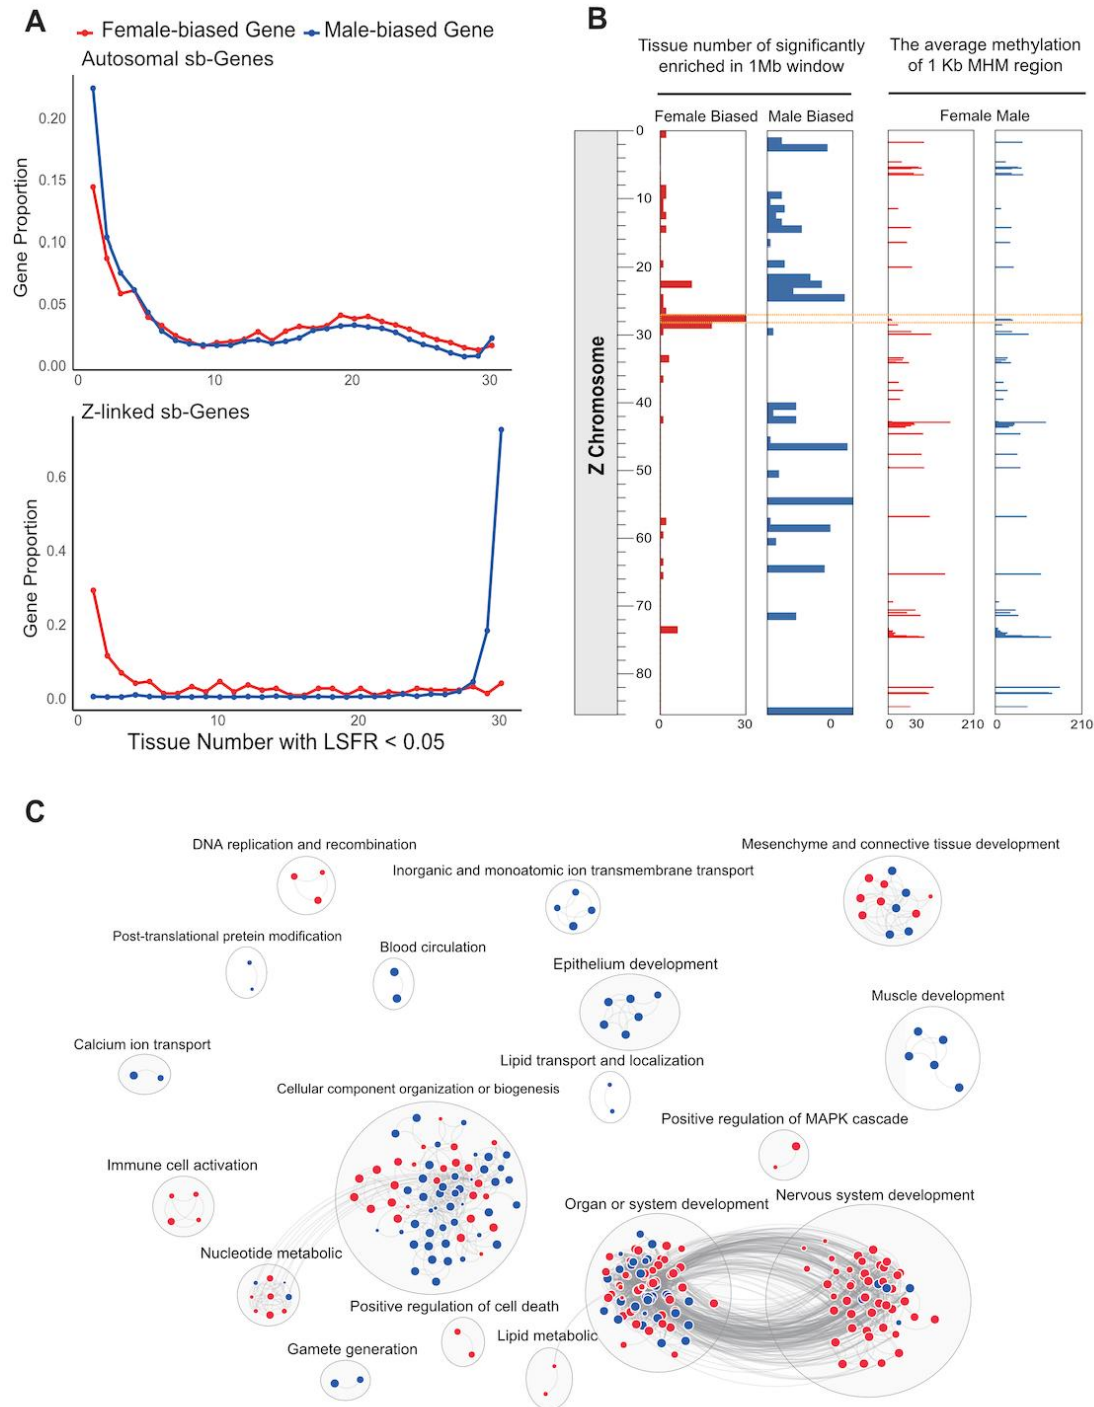

**Supplementary Fig. 36. Functional annotation and tissue-sharing of sex-biased genes**  
**(A)** MashR-derived tissue-sharing patterns of male- and female-biased genes across 30 tissues. Top panel = autosomal sbGenes; bottom panel = Z-linked sbGenes. **(B)** Landscape of sex-biased enrichment and male-hypermethylated (MHM) region methylation across the Z chromosome. Left panels show, for each 1-Mb window along the Z chromosome (y-axis), the number of tissues in which the window is significantly enriched for female-biased (red) or male-biased (blue) genes (x-axis). Right panels display the average DNA methylation level within 1-kb

MHM region(s) for females (red) and males (blue). The orange lines highlight a 30-tissue-shared female-biased region overlapping with a previously reported MHM region. (C) Clusters of functionally related gene sets enriched for sex-biased expression across tissues. Balloons denote enriched gene sets (female-biased, red; male-biased, blue), with sizes proportional to the across-tissue GSEA meta-analysis significance. Edges connect gene sets sharing leading-edge genes.

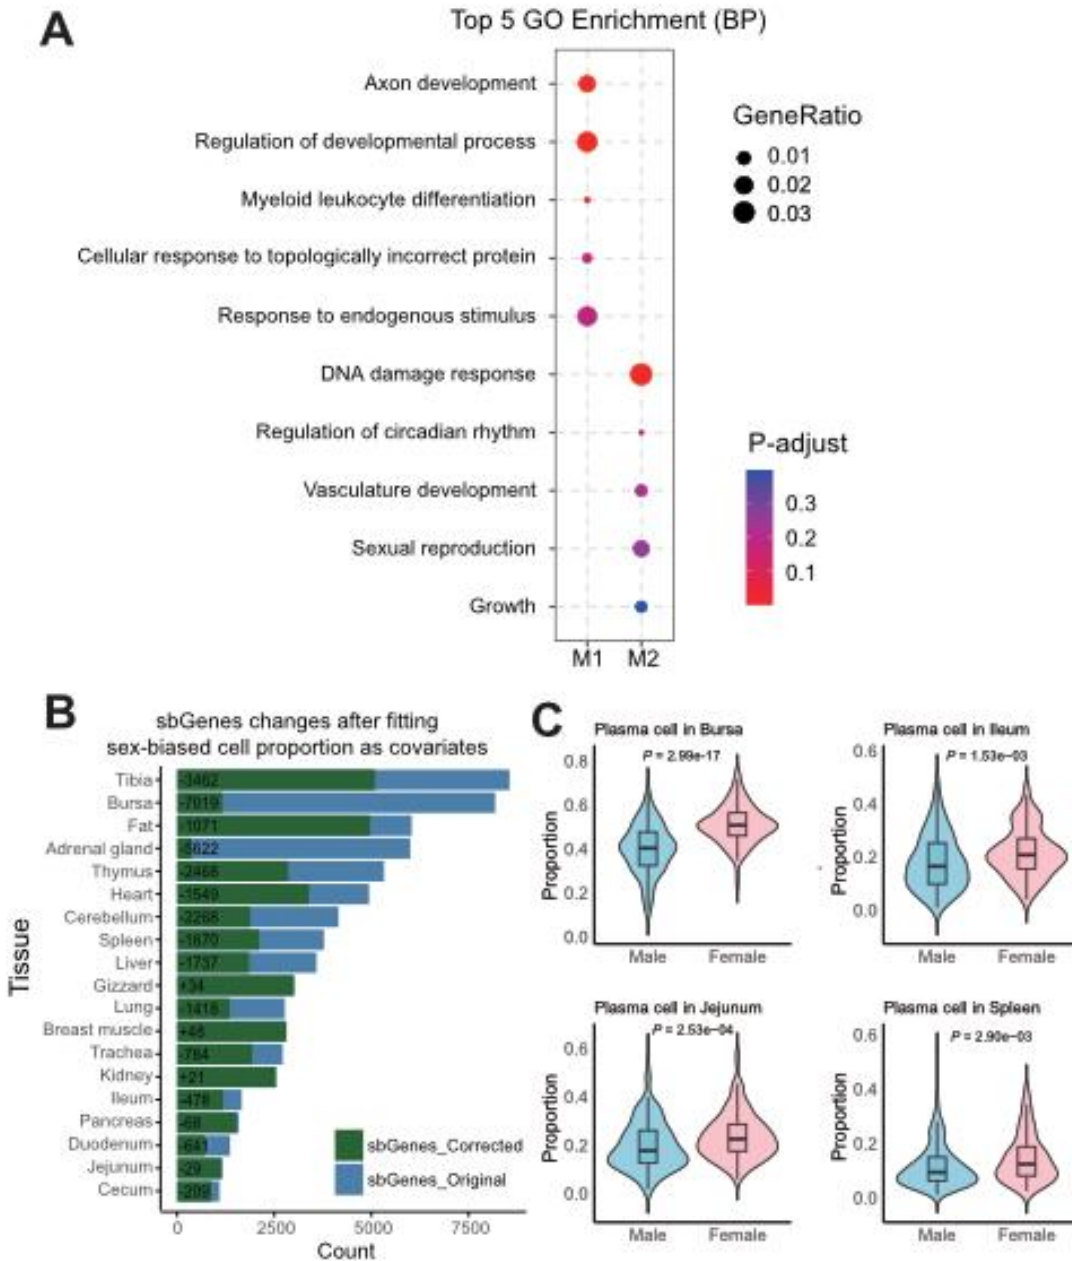

**Supplementary Fig. 37. Characterization of sex-biased co-expression modules and cell types**

(A) GO enrichment analysis of gene sets in sex-biased modules M1 and M2 identified in hypothalamus. (B) Identification of sex-biased genes following adjustment for sex-biased cell

type proportions as covariates, across 30 tissues. (C) Female-biased plasma cell proportions in bursa, ileum, jejunum, and spleen tissues, respectively.

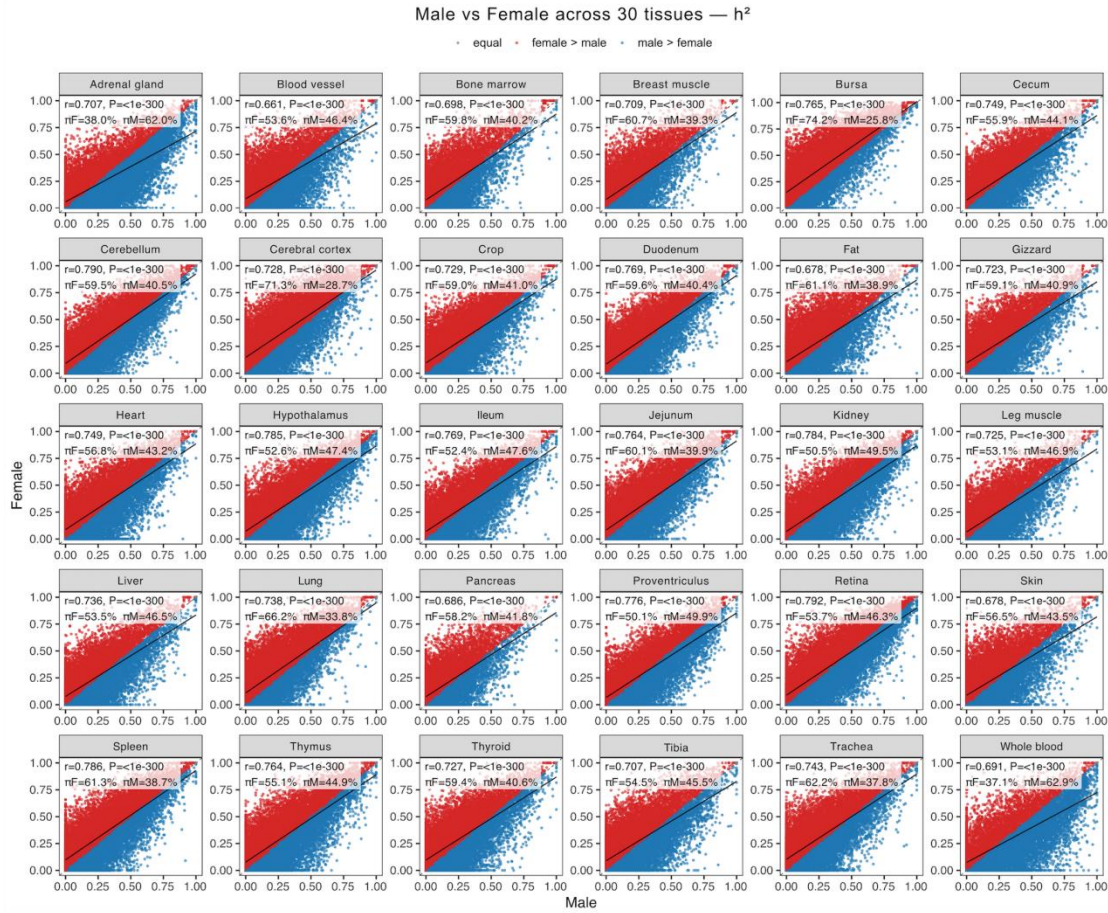

**Supplementary Fig. 38. Correlations of  $cis-h^2$  estimates for gene expression in male- and female-stratified populations**

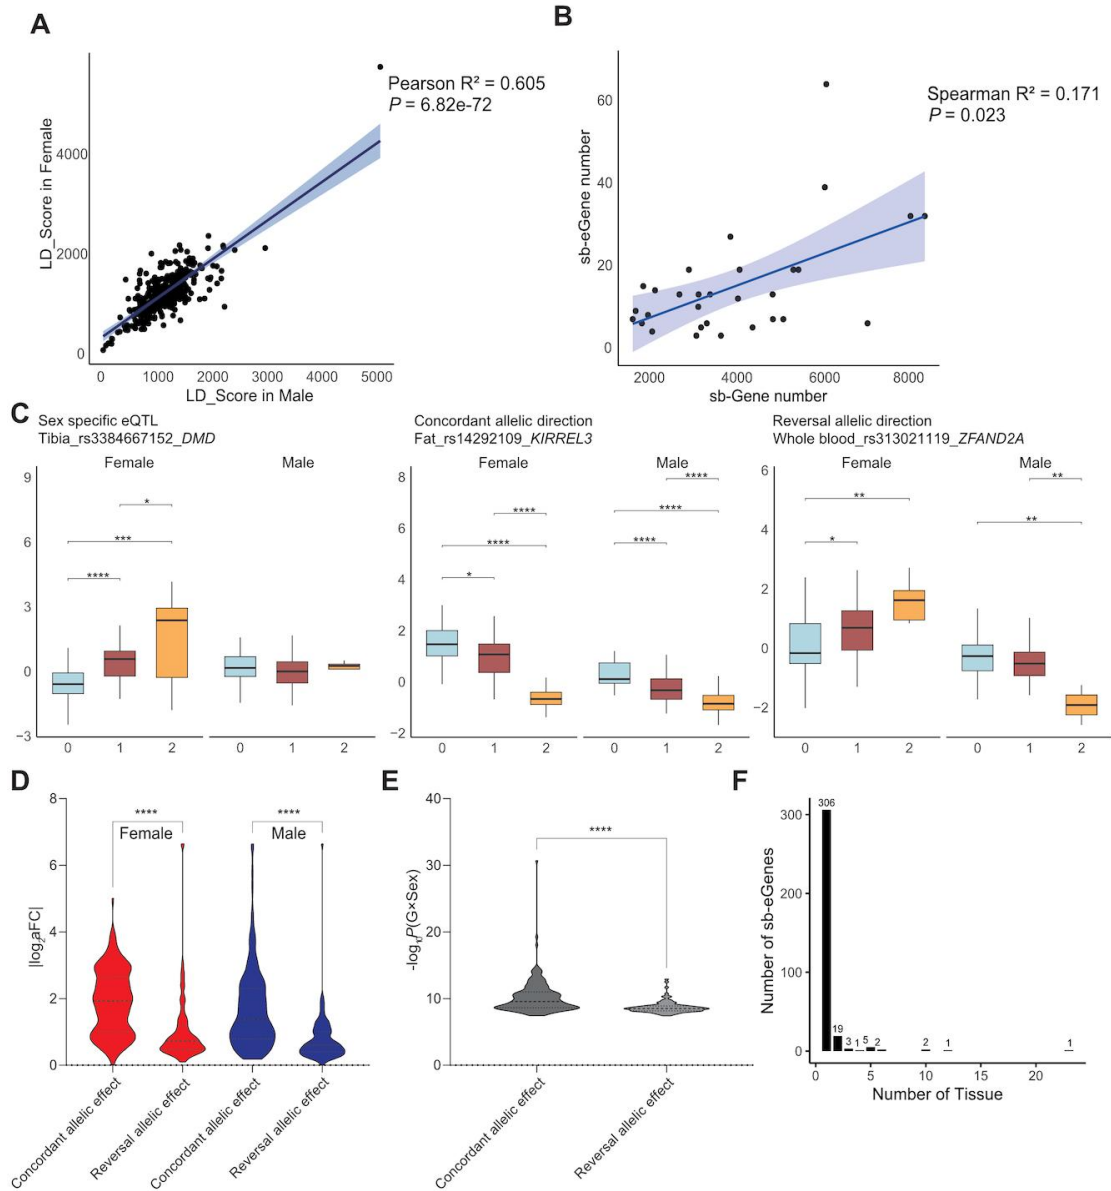

**Supplementary Fig. 39. Sex-stratified population structure and sex-biased gene regulation**  
**(A)** Correlation of LD scores calculated from male- and female-stratified subpopulations. **(B)** Correlation of sbGene number and sb-eGene number. **(C)** Examples of sex-specific (left), sex-different (middle), and sex-reversed eQTL (right). **(D)** Comparison of absolute effect sizes between sex-different and sex-reversed eQTL in male- and female-stratified subpopulations. **(E)** G×Sex interaction significance comparison between sex different and sex-reversed eQTL. **(F)** Distribution of tissue overlap for sb-eGenes.

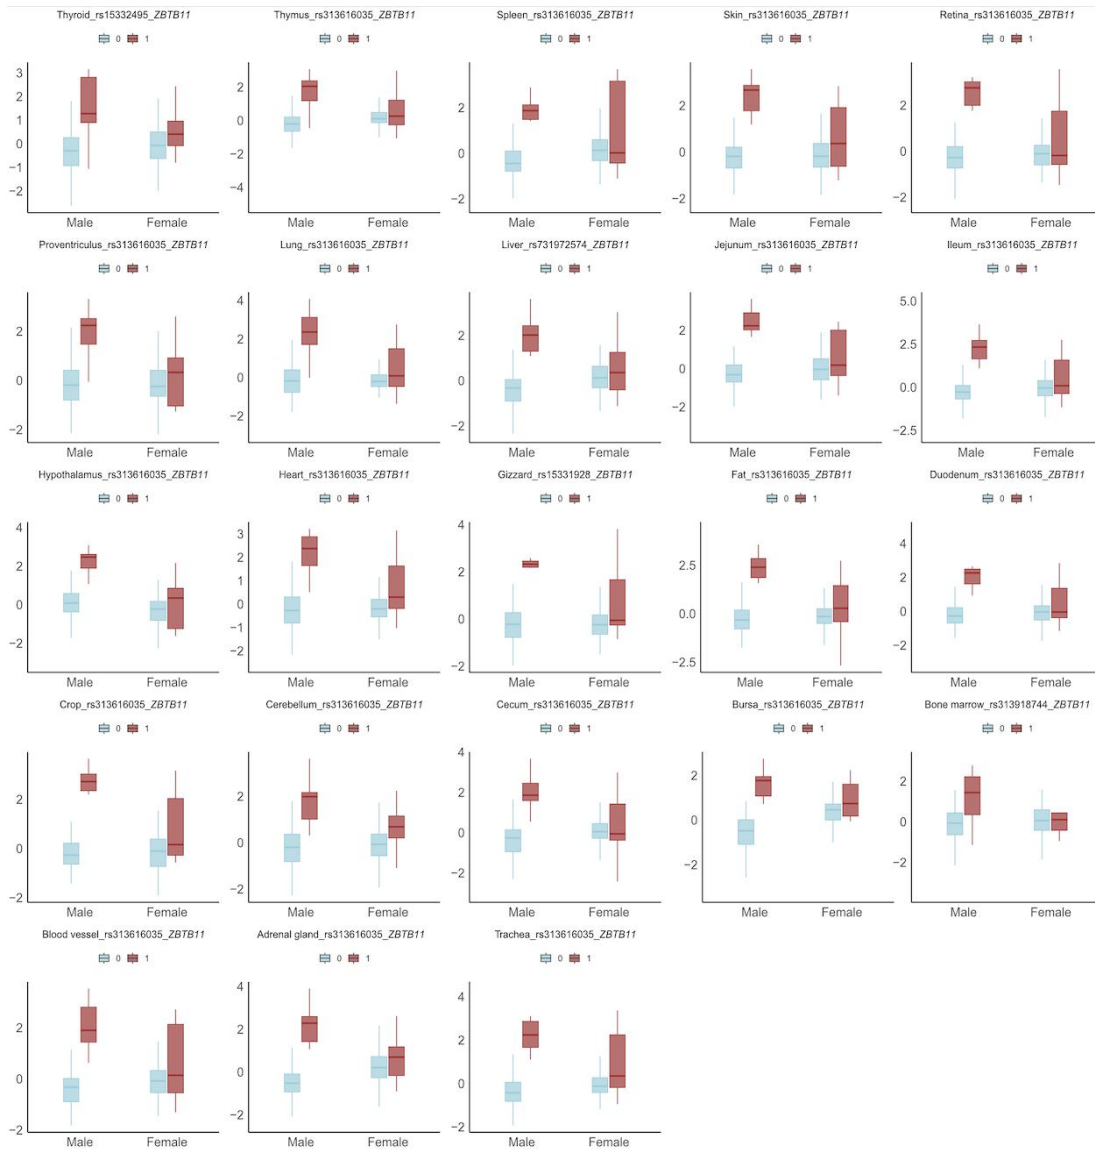

**Supplementary Fig. 40. Example of the concordant effects of the male-biased eQTL rs15332495 in regulating *ZBTB11* across 23 tissues**

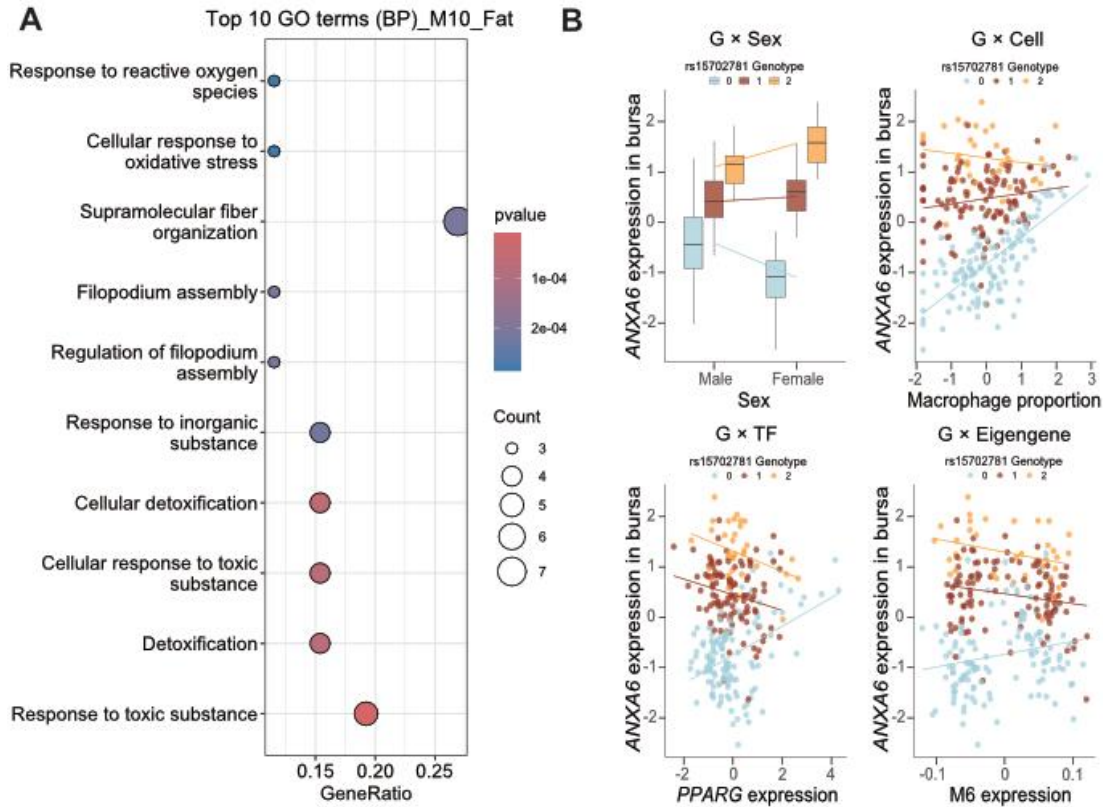

**Supplementary Fig. 41. Mechanistic mediation analysis of sex-biased gene regulation**  
**(A)** GO enrichment of gene sets in coexpression module M10 identified in fat tissue. **(B)** Example of the sex-biased eQTL *rs15702781* in regulating *ANXA6* expression, mediated by macrophage proportion, transcriptional factor *PPARG* gene expression, and eigengene expression of module M6 in bursa.

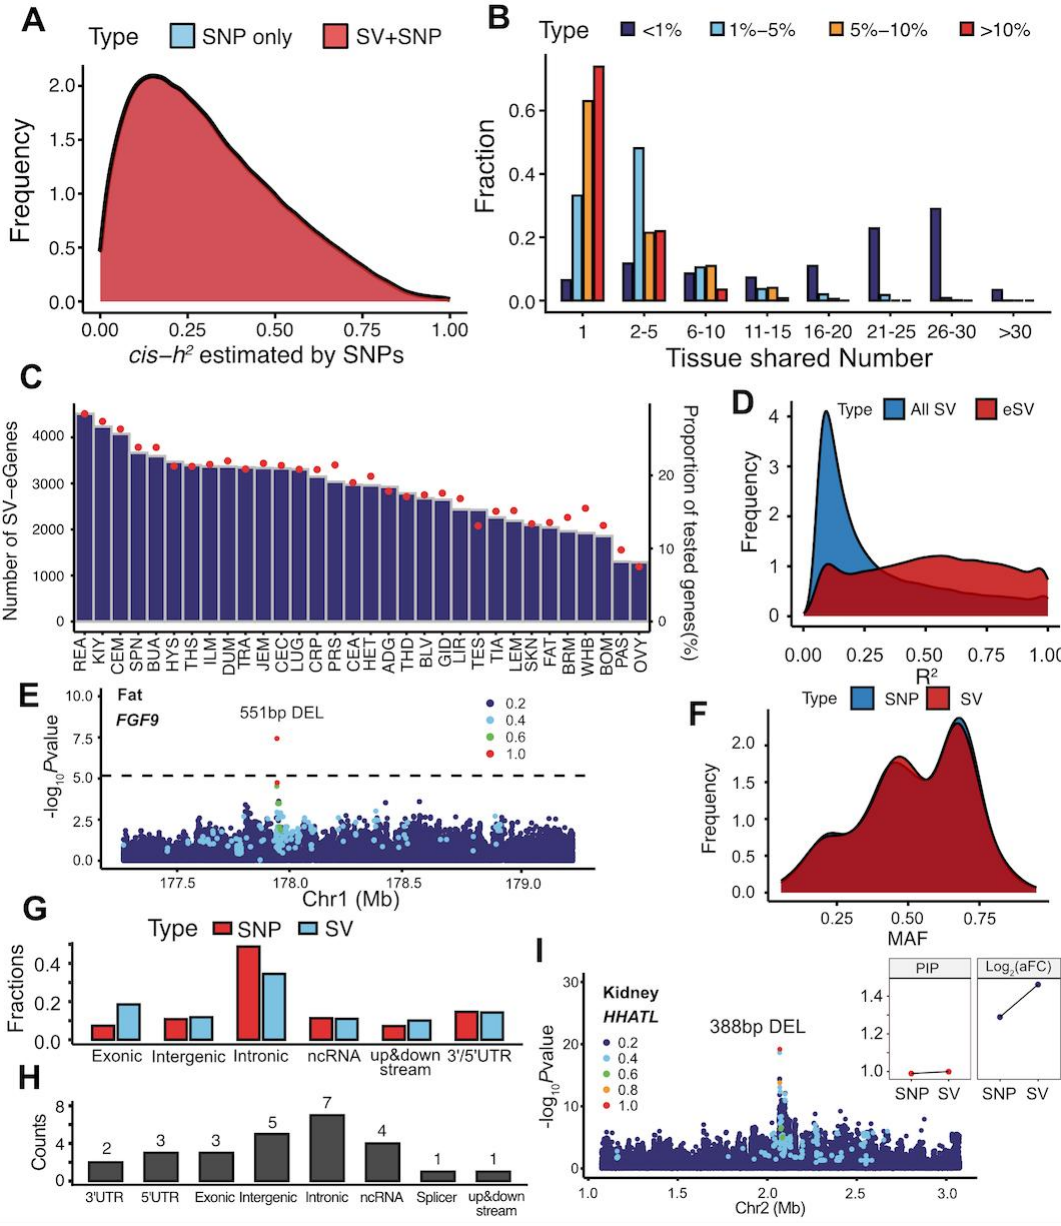

**Supplementary Fig. 42. Estimation of  $cis-h^2$  with SV inclusion and SV-mediated genetic regulation across tissues**

**(A)** Distribution of gains in  $cis-h^2$  following the inclusion of SV in the estimation model. **(B)** Proportion of genes stratified by tissue-sharing number, categorized according to the magnitude of  $cis-h^2$  increase conferred by SV inclusion. **(C)** Number of SV-eGenes detected and their proportion relative to all tested genes across 32 tissues. Bars represent the SV-eGene counts; points represent the proportion of SV-eGenes among tested genes. **(D)** Comparison of LD distribution between expression-associated (eSV), all SV, and SNP. **(E)** Example of *FGF9* expression regulated exclusively by SV but not by SNP in adipose tissue. **(F)** Distribution of MAF-matched fine-mapped SNP and SV that regulate the same gene expression. **(G)** Fractions of MAF-matched fine-mapped SV-eQTL and SNP-eQTL located within functional genomic regions. **(H)** Fractions of fine-mapped SV-leading eQTL distributed across functional genomic regions. **(I)** Example of a fine-mapped SV-leading eQTL regulating *HHATL* expression in

kidney, exhibiting high posterior inclusion probability (PIP) and effect size compared to SNP within the same fine-mapped credible set.

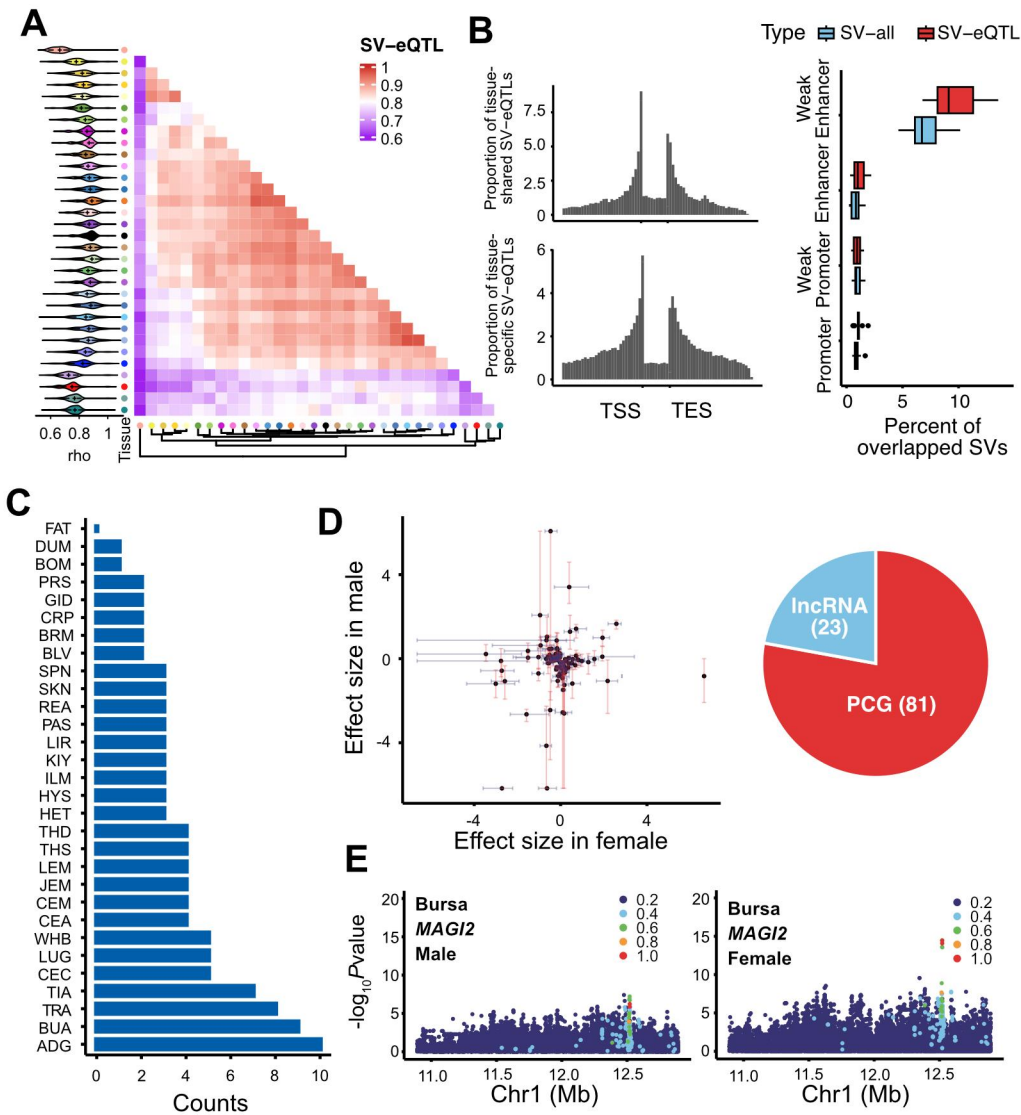

**Supplementary Fig. 43. Tissue-sharing patterns and sex-biased regulation of SV-eQTL**  
**(A)** Pairwise tissue-sharing patterns of SV-eQTL effect sizes, shown as Spearman's correlation coefficients (left: distribution per tissue; bottom: hierarchical clustering of tissues by regulatory similarity). Tissue types are color-coded as in Fig. 2E. **(B)** Distance to TSS of tissue-shared (top) and tissue-specific (bottom) SV-eQTL, along with functional enrichment of SV-eQTL within annotated enhancer and promoter regions. **(C)** Counts of sex-biased SV-eQTL identified across 32 tissues. **(D)** Effect size estimates of sex-specific SV-eQTL in male- and female-stratified subpopulations. Points and bars represent mean effect sizes and confidence intervals. Sex-specific SV-eQTL are defined as loci whose confidence interval overlaps with zero in one sex but not the other. Right panel: pie chart showing the distribution of genes under sex-specific regulation. **(E)** Representative example of female-specific regulation of *MAGI2* regulation by a 596 bp insertion in bursa tissue.

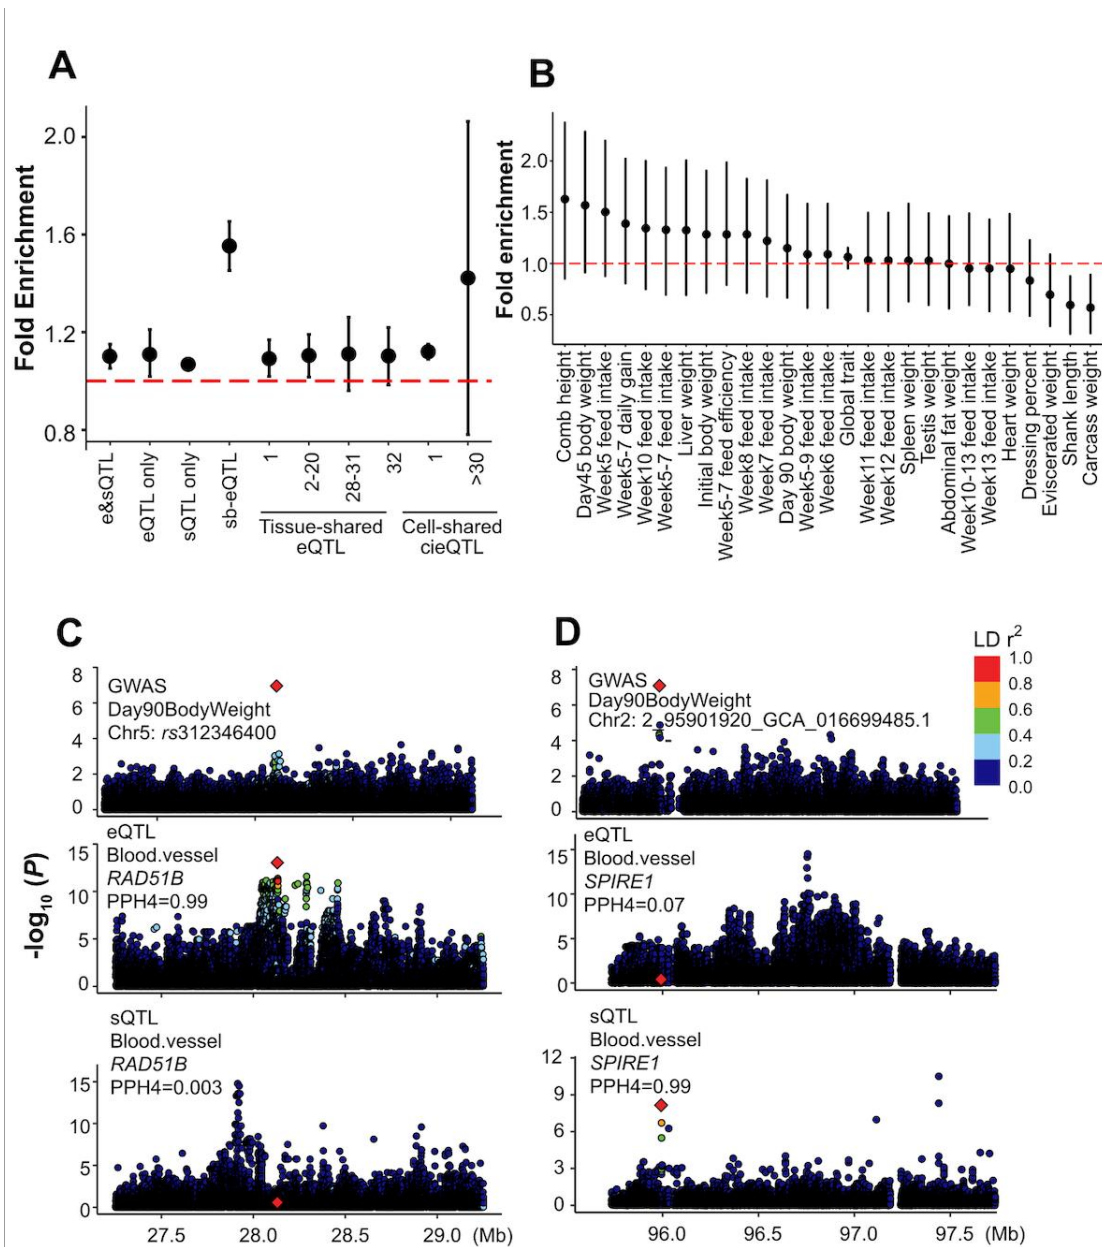

**Supplementary Fig. 44. Genetic enrichment of molQTL and context-dependent QTL with complex traits, and examples of the specialized colocalization with molQTL**

(A) Fold enrichment of complex trait GWAS loci with molQTL, sb-eQTL, tissue-specific or shared eQTL, cell type-specific or shared cieQTL. (B) Summary of fold enrichment results of sb-eQTL with different complex traits. (C) Colocalization of day 90 body weight GWAS locus (*rs312346400*) with eQTL only in regulating the expression of *RAD51B* in blood vessel. (D) Colocalization of day 90 body weight GWAS locus (*2\_95901920\_GCA\_016699485.1*) with eQTL only in regulating the expression of *RAD51B* in blood vessel.

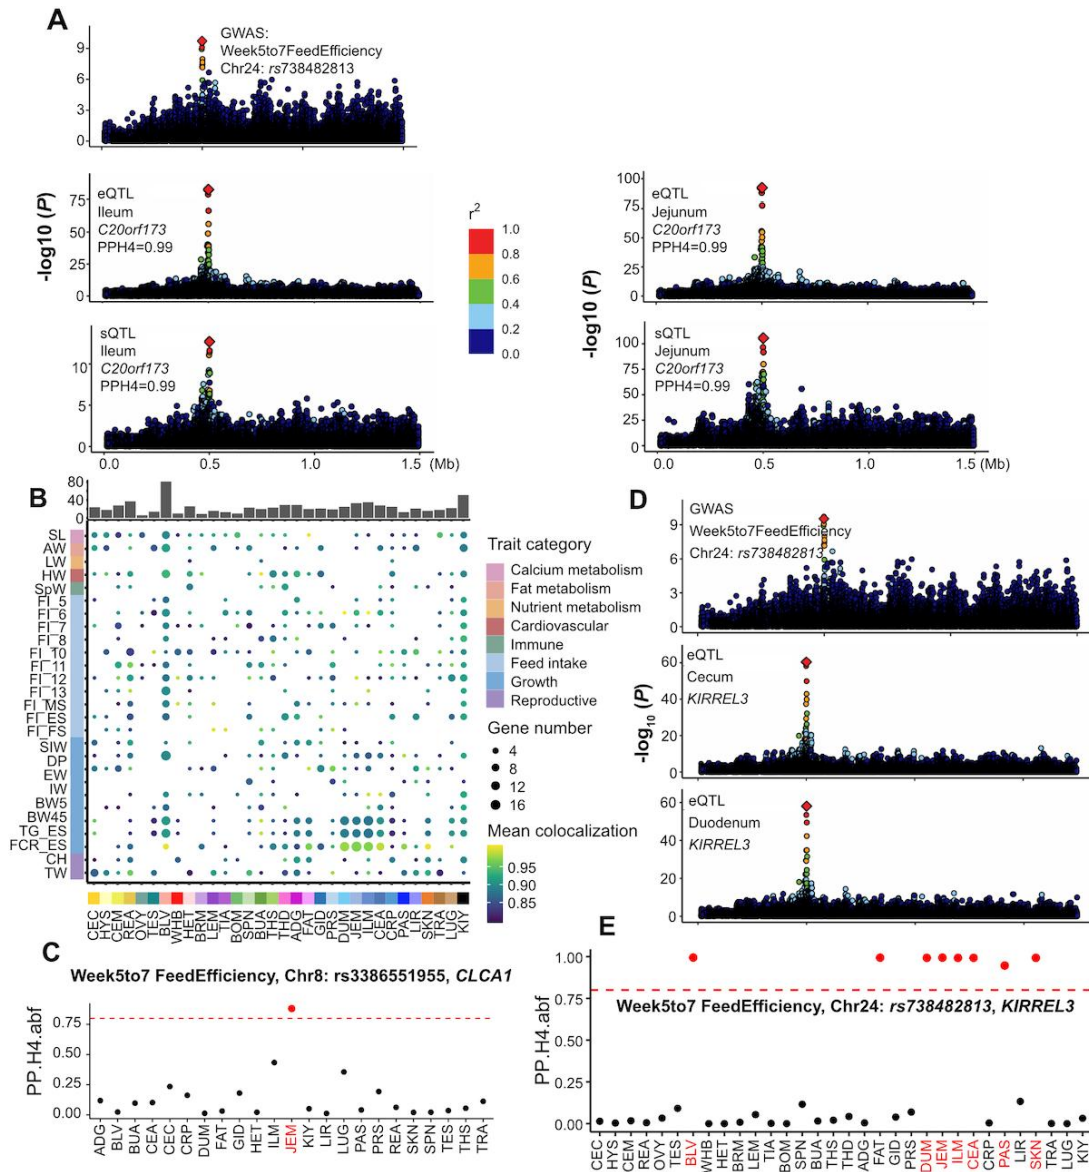

**Supplementary Fig. 45. Examples and summary of complex trait GWAS loci colocalized with molQTL, content-dependent eQTL or tissue-specific eQTL.**

(A) The colocalizations of week 5-7 feed efficiency GWAS signal *rs738482813* with both eQTL and sQTL of *C20orf173* in additional intestinal tissues except for cecum listed in Fig. 9B. (B) Summary of all significant colocalization signals (PP.H4 > 0.8) across all tissues and complex traits, which categorized into 8 groups. The top barplot showed the sum of total colocalized genes identified in each tissue. (C) Tissue-specific eQTL colocalization example. Week 5-7 GWAS locus *rs3386551955* shows to colocalize with the *CLCA1* eQTL exclusively in jejunum. The red dash line indicate the PP.H4 = 0.8. (D) Multi-tissue colocalization example of *KIRREL3* eQTL with week 5-7 feed efficiency GWAS signal (*rs738482813*). (E) *KIRREL3* eQTL multi-tissue colocalization example. Week 5-7 GWAS locus *rs738482813* shows to colocalize with the *KIRREL3* eQTL in blood vessel, duodenum, jejunum, ileum, cecum, pancreas, and skin. The red dash line indicate the PP.H4 = 0.8.

**Supplementary Table 1: Summary of tissue type information and anatomical sites of samples collected from ChickenSexGTEEx cohort.**

| <b>Anatomical system</b> | <b>Tissue type</b> | <b>Abbreviations</b> | <b>Anatomical position</b>                                                                                 | <b>Sample size<br/>(Female, Male)</b> |
|--------------------------|--------------------|----------------------|------------------------------------------------------------------------------------------------------------|---------------------------------------|
| Cardiovascular           | Blood vessel       | BLV                  | Aortic arch, the major blood vessel from the left ventricle of the heart.                                  | 249 (116, 133)                        |
|                          | Heart              | HET                  | Apex of the heart, the inferolateral region of the left ventricle.                                         | 273 (126, 147)                        |
|                          | Whole blood        | WHB                  | Wing vein blood.                                                                                           | 195 (100, 95)                         |
| Digestive                | Crop               | CRP                  | Mid-region of the crop, including mucosa, submucosa, muscularis externa, and serosa                        | 272 (125, 147)                        |
|                          | Proventriculus     | PRS                  | Mid-region of the proventriculus, including mucosa, submucosa, muscularis externa, and serosa.             | 274 (127, 147)                        |
|                          | Gizzard            | GID                  | Mid-region of the muscular lateral part of gizzard with the cuticle removed.                               | 275 (129, 146)                        |
|                          | Duodenum           | DUM                  | Proximal duodenal mucosal layers, approximately 2-3 centimeters distal to the connection to gizzard.       | 274 (128, 146)                        |
|                          | Jejunum            | JEM                  | Proximal jejunal mucosal layers, approximately 5-7 centimeters distal to the duodenojejunal flexure.       | 274 (127, 147)                        |
|                          | Ileum              | ILM                  | Distal ileal mucosal layers, approximately 1-3 centimeters proximal to the ileocecal junction.             | 273 (129, 144)                        |
|                          | Cecum              | CEA                  | Proximal region of the right cecal mucosal layers, approximately 3-4 centimeters to the blind-ended pouch. | 275 (129, 146)                        |
|                          | Pancreas           | PAS                  | Pancreatic body, mid-region of the pancreas.                                                               | 267 (126, 141)                        |

|           |                     |     |                                                                                                     |                |
|-----------|---------------------|-----|-----------------------------------------------------------------------------------------------------|----------------|
|           | Liver               | LIR | Right lobe of the liver parenchyma, avoiding major blood vessels and bile ducts.                    | 278 (130, 148) |
| Endocrine | Abdominal Fat       | FAT | Central region of the abdominal fat pad, avoiding any adjacent muscle or visceral organs.           | 264 (120, 144) |
|           | Adrenal gland       | ADG | The whole paired adrenal gland, cranial to the kidney.                                              | 263 (124, 139) |
|           | Thyroid             | THD | The whole right thyroid gland, located adjacent to the right carotid artery and right jugular vein. | 269 (127, 142) |
| Lymphatic | Bone marrow         | BOM | Left tibia bone marrows, distributed in the medullary cavity of the tibia.                          | 269 (127, 142) |
|           | Bursa               | BUA | Central region of the bursa, which is located dorsal to the cloaca.                                 | 277 (129, 148) |
|           | Spleen              | SPN | Mid-region of the spleen, near the proventriculus and gizzard.                                      | 274 (128, 146) |
|           | Thymus              | THS | One of the cranial lobes of the thymus, located in the cervical and thoracic regions.               | 260 (125, 135) |
| Motor     | Tibial growth plate | TIA | Growth plate of the tibia, the hyaline cartilage located the proximal end of the tibia.             | 257 (119, 138) |
|           | Breast muscle       | BRM | Pectoralis major muscle, particularly selected from the mid-region of the pectoralis major.         | 267 (126, 141) |
|           | Leg muscle          | LEM | Mid-belly region of the gastrocnemius.                                                              | 275 (127, 148) |
| Nervous   | Cerebral cortex     | CEC | Dorsal region of the right cerebral cortex.                                                         | 271 (129, 142) |
|           | Hypothalamus        | HYS | The base of the diencephalon, right below the thalamus.                                             | 252 (122, 130) |
|           | Cerebellum          | CEM | Vermis (midline region) of the cerebellum.                                                          | 271 (128, 143) |

|              |         |     |                                                                                                         |                |
|--------------|---------|-----|---------------------------------------------------------------------------------------------------------|----------------|
| Reproductive | Ovary   | OVY | Left ovary follicles and stroma, avoiding collecting the kidneys and adrenal glands.                    | 127            |
|              | Testis  | TES | Mid-region of the left testis, avoiding the epididymis.                                                 | 146            |
| Respiratory  | Lung    | LUG | Mid-region of the right lung, including the parabronchi, blood vessels and connective tissues.          | 276 (127, 149) |
|              | Trachea | TRA | Mid-cervical region of trachea, mainly to include the cartilaginous rings and epithelium.               | 275 (126, 149) |
| Sensory      | Retina  | REA | Retina layers, located at the posterior part of the eyeball between the vitreous humor and the choroid. | 265(121, 144)  |
|              | Skin    | SKN | Midline region of the dorsal skin between the scapulae and the base of the tail, without feathers.      | 251 (123, 128) |
| Urinary      | Kidney  | KIY | Mid-part of the middle lobe of the kidney, avoiding adrenal gland or ureter.                            | 275 (125, 150) |

**Supplementary Table 2: Comparison of identified eGenes and sGenes numbers between ChickenSexGTEEx and ChickenGTEEx pilot phase**

| Tissue          | ChickenSexGTEEx |                 | ChickenGTEEx pilot phase | Overlap | Type  |
|-----------------|-----------------|-----------------|--------------------------|---------|-------|
|                 | eGene/sGene     | independent QTL |                          |         |       |
| Adrenal gland   | 12656           | 22449           | 0                        | 0       | eGene |
| Blood vessel    | 11052           | 16737           | 0                        | 0       | eGene |
| Bone marrow     | 9213            | 14257           | 0                        | 0       | eGene |
| Breast muscle   | 9062            | 14298           | 0                        | 0       | eGene |
| Bursa           | 12364           | 22874           | 1101                     | 995     | eGene |
| Cecum           | 12008           | 20692           | 184                      | 140     | eGene |
| Cerebellum      | 13369           | 22439           | 268                      | 250     | eGene |
| Cerebral cortex | 12741           | 23803           | 0                        | 0       | eGene |
| Crop            | 11762           | 20460           | 0                        | 0       | eGene |
| Duodenum        | 12161           | 22022           | 18                       | 12      | eGene |

|                 |       |       |      |      |       |
|-----------------|-------|-------|------|------|-------|
| Fat             | 9959  | 15683 | 1186 | 973  | eGene |
| Gizzard         | 10805 | 18342 | 0    | 0    | eGene |
| Heart           | 11304 | 20082 | 2271 | 1906 | eGene |
| Hypothalamus    | 12383 | 22546 | 1307 | 1123 | eGene |
| Ileum           | 12203 | 21826 | 21   | 17   | eGene |
| Jejunum         | 12118 | 21721 | 78   | 64   | eGene |
| Kidney          | 12799 | 23783 | 618  | 534  | eGene |
| Leg muscle      | 9870  | 15893 | 0    | 0    | eGene |
| Liver           | 10703 | 18003 | 8644 | 6352 | eGene |
| Lung            | 12330 | 21681 | 50   | 44   | eGene |
| Ovary           | 11085 | 15706 | 748  | 497  | eGene |
| Pancreas        | 7990  | 11829 | 0    | 0    | eGene |
| Proventriculus  | 11193 | 20887 | 0    | 0    | eGene |
| Retina          | 13927 | 24250 | 1556 | 1486 | eGene |
| Skin            | 10411 | 16382 | 838  | 617  | eGene |
| Spleen          | 12601 | 22688 | 6597 | 5397 | eGene |
| Testis          | 14268 | 23160 | 63   | 43   | eGene |
| Thymus          | 12947 | 23486 | 307  | 290  | eGene |
| Thyroid         | 12464 | 21895 | 0    | 0    | eGene |
| Tibia           | 11096 | 18713 | 0    | 0    | eGene |
| Trachea         | 12663 | 21817 | 1819 | 1651 | eGene |
| Whole blood     | 9667  | 16746 | 4287 | 3119 | eGene |
| Adrenal gland   | 5600  | 8885  | 0    | 0    | sGene |
| Blood vessel    | 6285  | 9099  | 0    | 0    | sGene |
| Bone marrow     | 4015  | 6047  | 0    | 0    | sGene |
| Breast muscle   | 4284  | 6437  | 0    | 0    | sGene |
| Bursa           | 5562  | 10372 | 436  | 301  | sGene |
| Cecum           | 6014  | 10374 | 84   | 52   | sGene |
| Cerebellum      | 5552  | 9345  | 80   | 50   | sGene |
| Cerebral cortex | 5209  | 8428  | 0    | 0    | sGene |
| Crop            | 5182  | 8446  | 0    | 0    | sGene |
| Duodenum        | 5641  | 10085 | 51   | 27   | sGene |
| Fat             | 4366  | 6675  | 441  | 267  | sGene |
| Gizzard         | 4996  | 8201  | 0    | 0    | sGene |
| Heart           | 4932  | 7971  | 703  | 446  | sGene |
| Hypothalamus    | 5443  | 8743  | 515  | 314  | sGene |
| Ileum           | 6042  | 10806 | 194  | 116  | sGene |

|                |      |       |      |      |       |
|----------------|------|-------|------|------|-------|
| Jejunum        | 5798 | 10241 | 152  | 113  | sGene |
| Kidney         | 5911 | 10884 | 187  | 129  | sGene |
| Leg muscle     | 4402 | 6789  | 0    | 0    | sGene |
| Liver          | 4387 | 7012  | 4594 | 2225 | sGene |
| Lung           | 6069 | 10426 | 284  | 187  | sGene |
| Ovary          | 6166 | 9546  | 618  | 332  | sGene |
| Pancreas       | 1885 | 2581  | 0    | 0    | sGene |
| Proventriculus | 3954 | 6403  | 0    | 0    | sGene |
| Retina         | 5834 | 10027 | 233  | 162  | sGene |
| Skin           | 4792 | 7247  | 362  | 190  | sGene |
| Spleen         | 5804 | 10822 | 4294 | 2601 | sGene |
| Testis         | 7626 | 13852 | 117  | 64   | sGene |
| Thymus         | 5672 | 10191 | 110  | 69   | sGene |
| Thyroid        | 5551 | 8951  | 0    | 0    | sGene |
| Tibia          | 4907 | 7741  | 0    | 0    | sGene |
| Trachea        | 5863 | 9760  | 393  | 278  | sGene |
| Whole blood    | 3774 | 6808  | 2366 | 1112 | sGene |

**Supplementary Table 3: Summary information of 26 complex traits and number of significant GWAS loci**

| Trait               | Abbreviations | Sample_size | Number of GWAS signals with different significance thresholds |                   |
|---------------------|---------------|-------------|---------------------------------------------------------------|-------------------|
|                     |               |             | P_val(0.00001)                                                | P_val(0.00000005) |
| Adipose weight      | AW            | 907         | 557                                                           | 199               |
| Comb Height         | CH            | 743         | 165                                                           | 0                 |
| Day45 Body Weight   | BW45          | 1531        | 399                                                           | 113               |
| Day90 Body Weight   | BW90          | 1528        | 351                                                           | 12                |
| Dressing Percentage | DP            | 972         | 607                                                           | 236               |
| Eviscerated Weight  | EW            | 984         | 230                                                           | 1                 |
| Heart Weight        | HW            | 974         | 365                                                           | 42                |
| Initial Body Weight | IW            | 1530        | 185                                                           | 0                 |
| Liver Weight        | LW            | 962         | 258                                                           | 12                |
| Tibial Length       | SL            | 968         | 486                                                           | 119               |
| Carcass Weight      | SIW           | 983         | 223                                                           | 2                 |
| Spleen Weight       | SpW           | 976         | 182                                                           | 2                 |
| Testis Weight       | TW            | 345         | 235                                                           | 2                 |
| Week10 Feed Intake  | FI_10         | 1515        | 191                                                           | 2                 |

|                                   |        |      |     |     |
|-----------------------------------|--------|------|-----|-----|
| Week11 Feed Intake                | FI_11  | 1526 | 273 | 21  |
| Week12 Feed Intake                | FI_12  | 1518 | 678 | 224 |
| Week13 Feed Intake                | FI_13  | 1486 | 695 | 349 |
| Week10to13<br>Average Feed Intake | FI_MS  | 1526 | 613 | 196 |
| Week5 Feed Intake                 | FI_5   | 1529 | 313 | 77  |
| Week5to7 Average<br>Daily Gain    | TG_ES  | 1521 | 335 | 82  |
| Week5to7 Feed<br>Conversion Ratio | FCR_ES | 1469 | 203 | 9   |
| Week5to7 Total Feed<br>Intake     | FI_ES  | 1531 | 591 | 229 |
| Week5to13 Total<br>Feed Intake    | FI_FS  | 1521 | 203 | 1   |
| Week6 Feed Intake                 | FI_6   | 1518 | 565 | 193 |
| Week7 Feed Intake                 | FI_7   | 1516 | 528 | 197 |
| Week8 Feed Intake                 | FI_8   | 1511 | 400 | 97  |

### Supplementary References

- 1 Guan, D. et al. Genetic regulation of gene expression across multiple tissues in chickens. *Nat. Genet.* **57**, 1298-1308 (2025).
- 2 Dietrich, A. et al. SimBu: bias-aware simulation of bulk RNA-seq data with variable cell-type composition. *Bioinformatics* **38**, ii141-ii147 (2022).
